# Supplementary material
Source: publisher figshare collection journal article supplement (https://gsapubs.figshare.com/articles/dataset/_/21136783)
Supplement: Supplementary file 1 [file 1]

## Supplemental Material

**Supplementary Figure S1.** (A) Probabilistic curves and histograms for detrital zircons in SW Ecuador and NW Peru. (B) Newly acquired U/Pb ages for the CT005 sample in NW Peru.

**Supplementary Figure S2.** (A)  $\epsilon\text{Hf}(t)$  and (B)  $\delta_{18}\text{O}$  as a function of sedimentary formations plotted against crystallization ages ( $^{206}\text{Pb}/^{238}\text{U}$ ).  $\epsilon\text{Hf}(t)$  values are normalized to present day chondritic values (CHUR). Vertical and horizontal bars represent  $2\sigma$  values.

**Supplementary Figure S3.** (A) Representative plots of REE distribution. (B) Analysis of the standard zircon 91500. (C)  $\log(\text{U}/\text{Yb})$  vs.  $\text{Hf}$  and  $\log(\text{Nb}/\text{Yb})$  compared to continental and oceanic domains (Grimes et al., 2015). (D)  $\text{Gd}/\text{Yb}$  vs.  $\text{Nb}/\text{Yb}$  showing high fractionation values for the 65–45 Ma interval. (E) Mean  $\text{Th}/\text{U}$  plotted against  $^{206}\text{Pb}/^{238}\text{U}$  age in 5 Ma intervals.

**Supplementary Figure S4.** Industrial seismic line showing the forearc area located between the border of the Chongón-Colonche Hills and the Andean piedmont near the Macuchi Block. The vertical exaggeration of the line is  $\sim 5$ . See Aizprua et al. (2020) for more details.

**Supplementary Figure S5.**  $\epsilon\text{Hf}(t)$  plotted against crystallization ages ( $^{206}\text{Pb}/^{238}\text{U}$ ) showing model ages for mantle zircons (black dots). The  $^{176}\text{Lu}/^{177}\text{Hf}$  evolution trend is inspired from Jones et al. (2015) for the Central Andes. Model ages (arrows) are from evolved  $\epsilon\text{Hf}(t)$  values paired with  $\delta_{18}\text{O}$  values for the 75–65 Ma and 45–30 Ma clusters.

**Table S1.** Sample information

**Table S2A.** U-Pb data for sample CT005

**Table S2B.** Operating conditions for the LA-ICP-MS equipment (**U-Pb**)

**Table S3A.** Lu-Hf isotopic data

**Table S3B.** Standards for Lu-Hf data

**Table S3C.** Neogene intrusions. Schutte (2009)

**Table S5A.** Zircon geochemistry

**Table S5B.** Standards for zircon geochemistry

**Table S5C.** Operating conditions for the LA-ICP-MS equipment (zircon geochemistry)

**A**

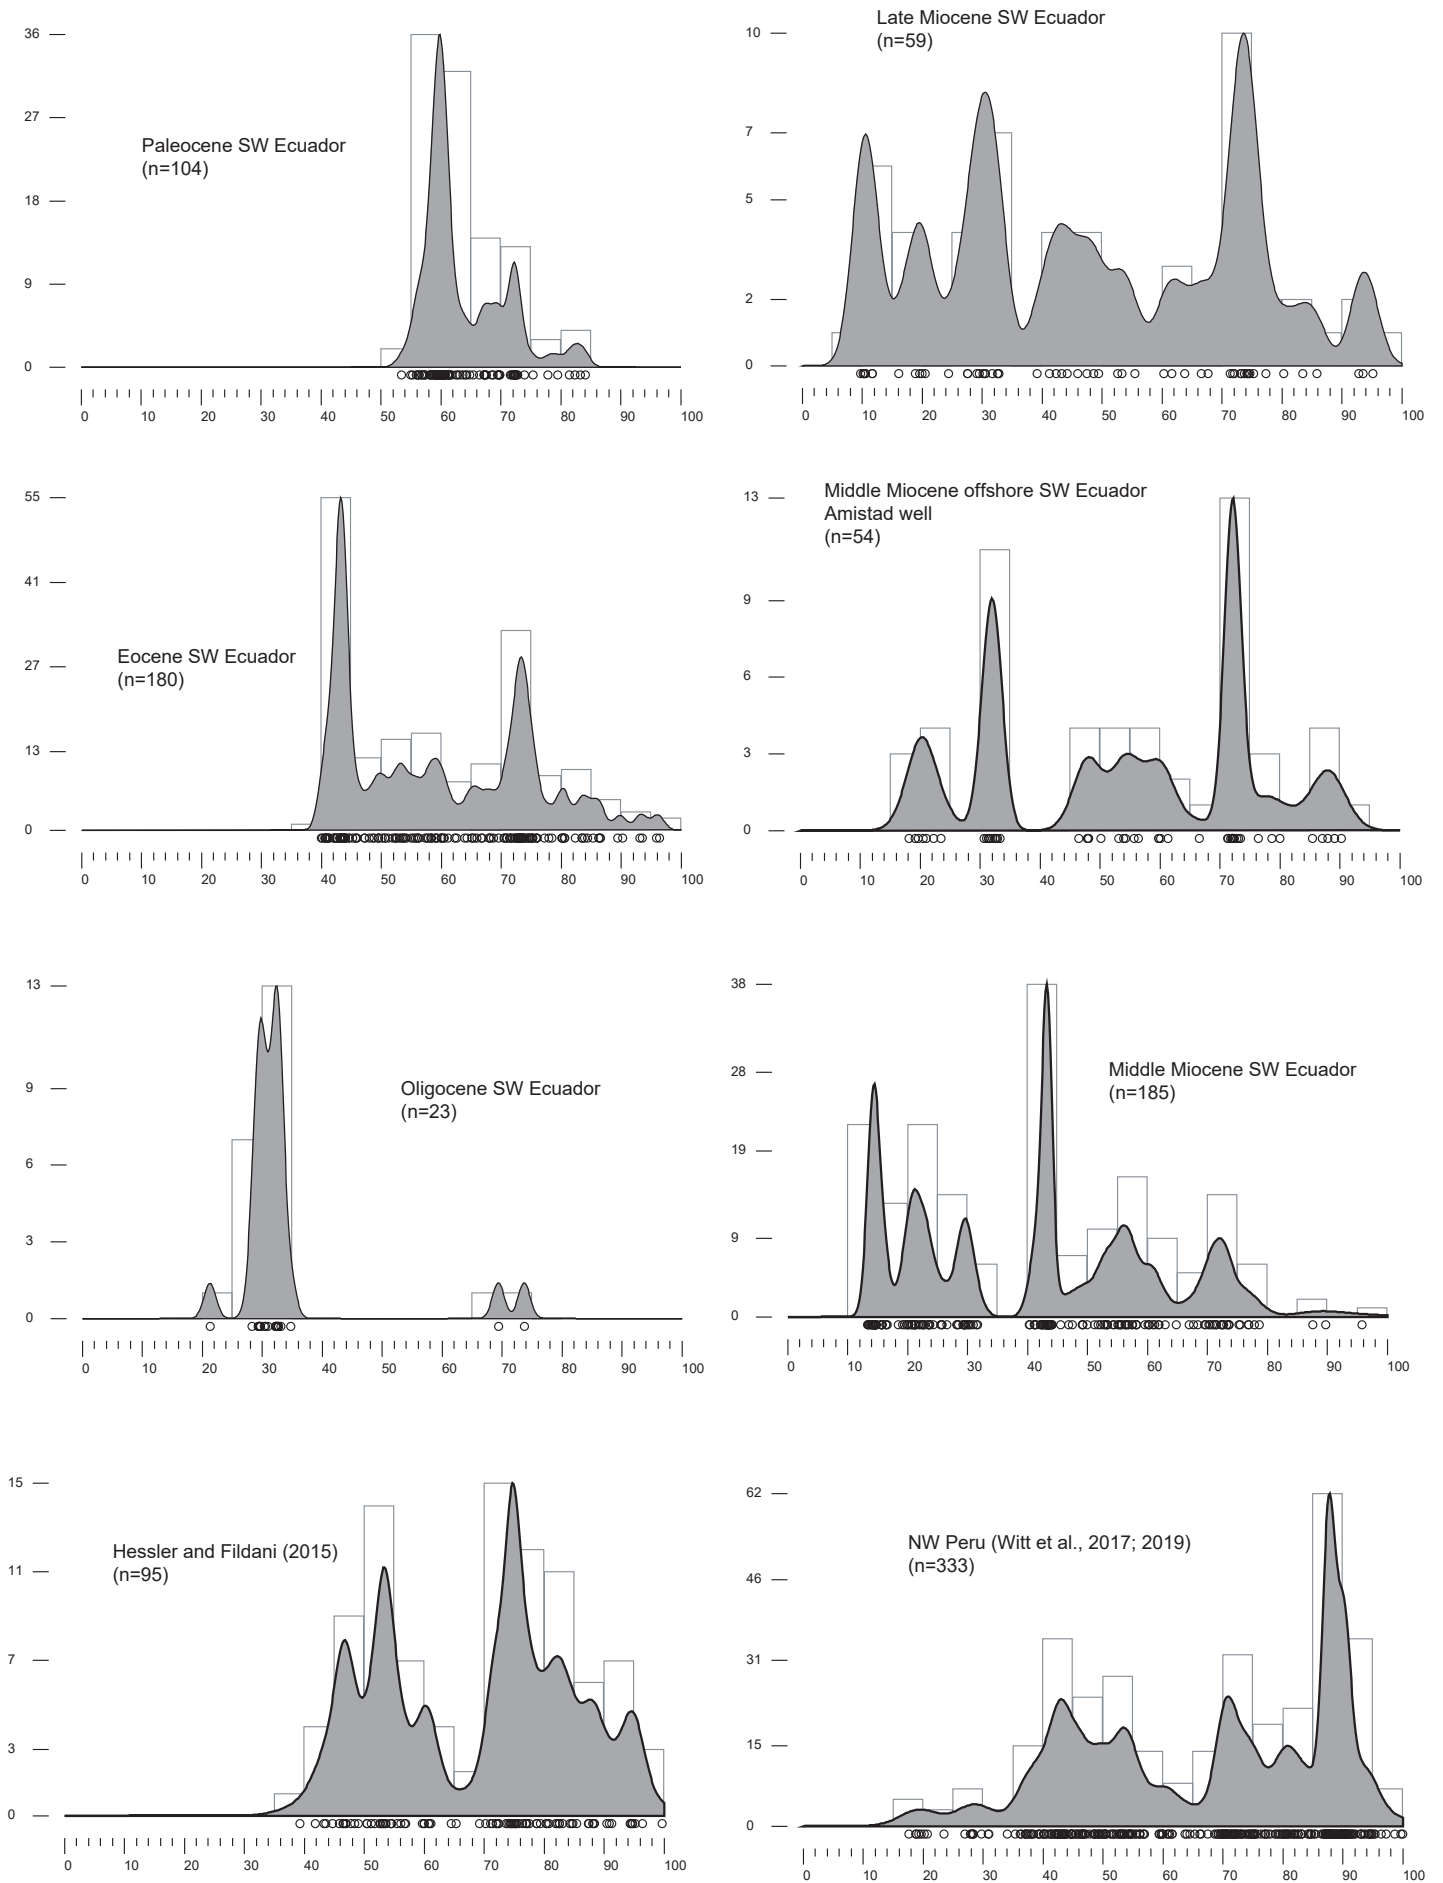

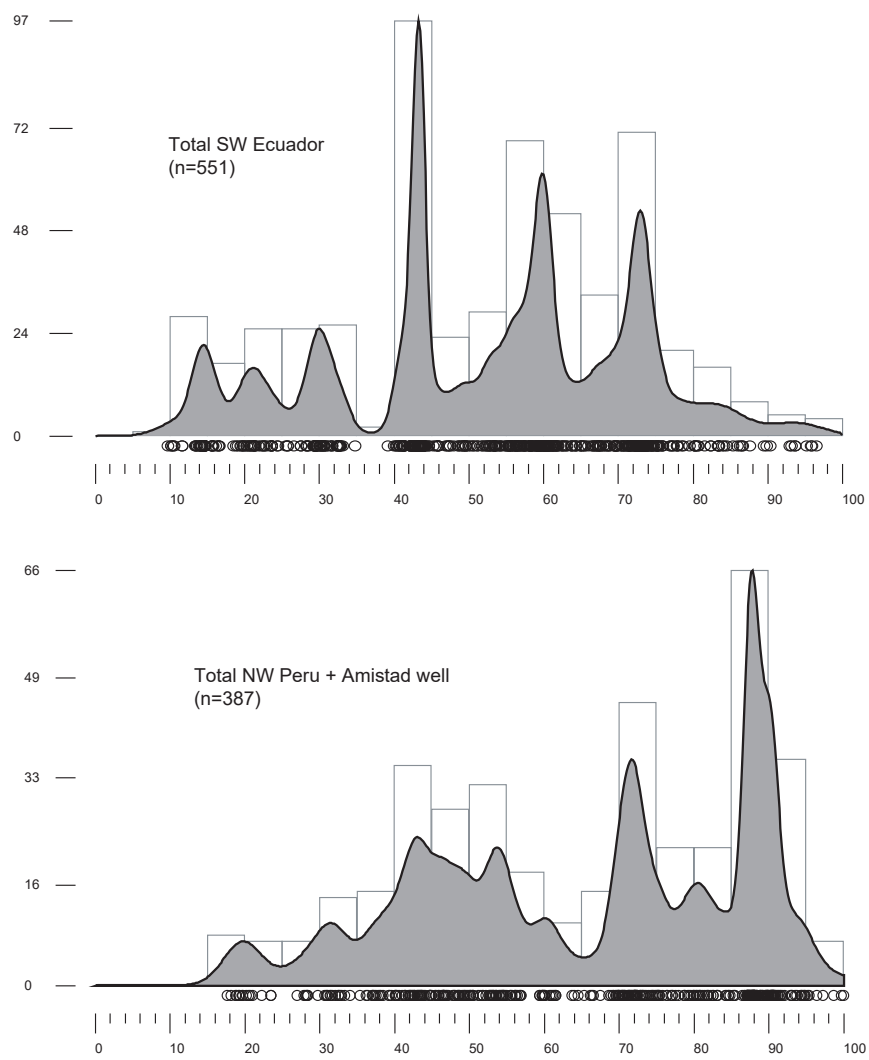

**B**

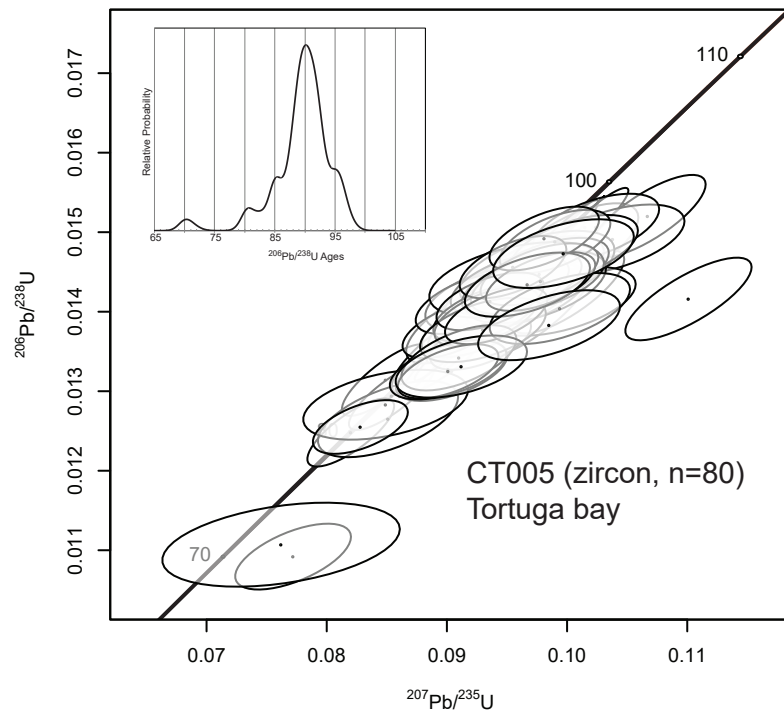

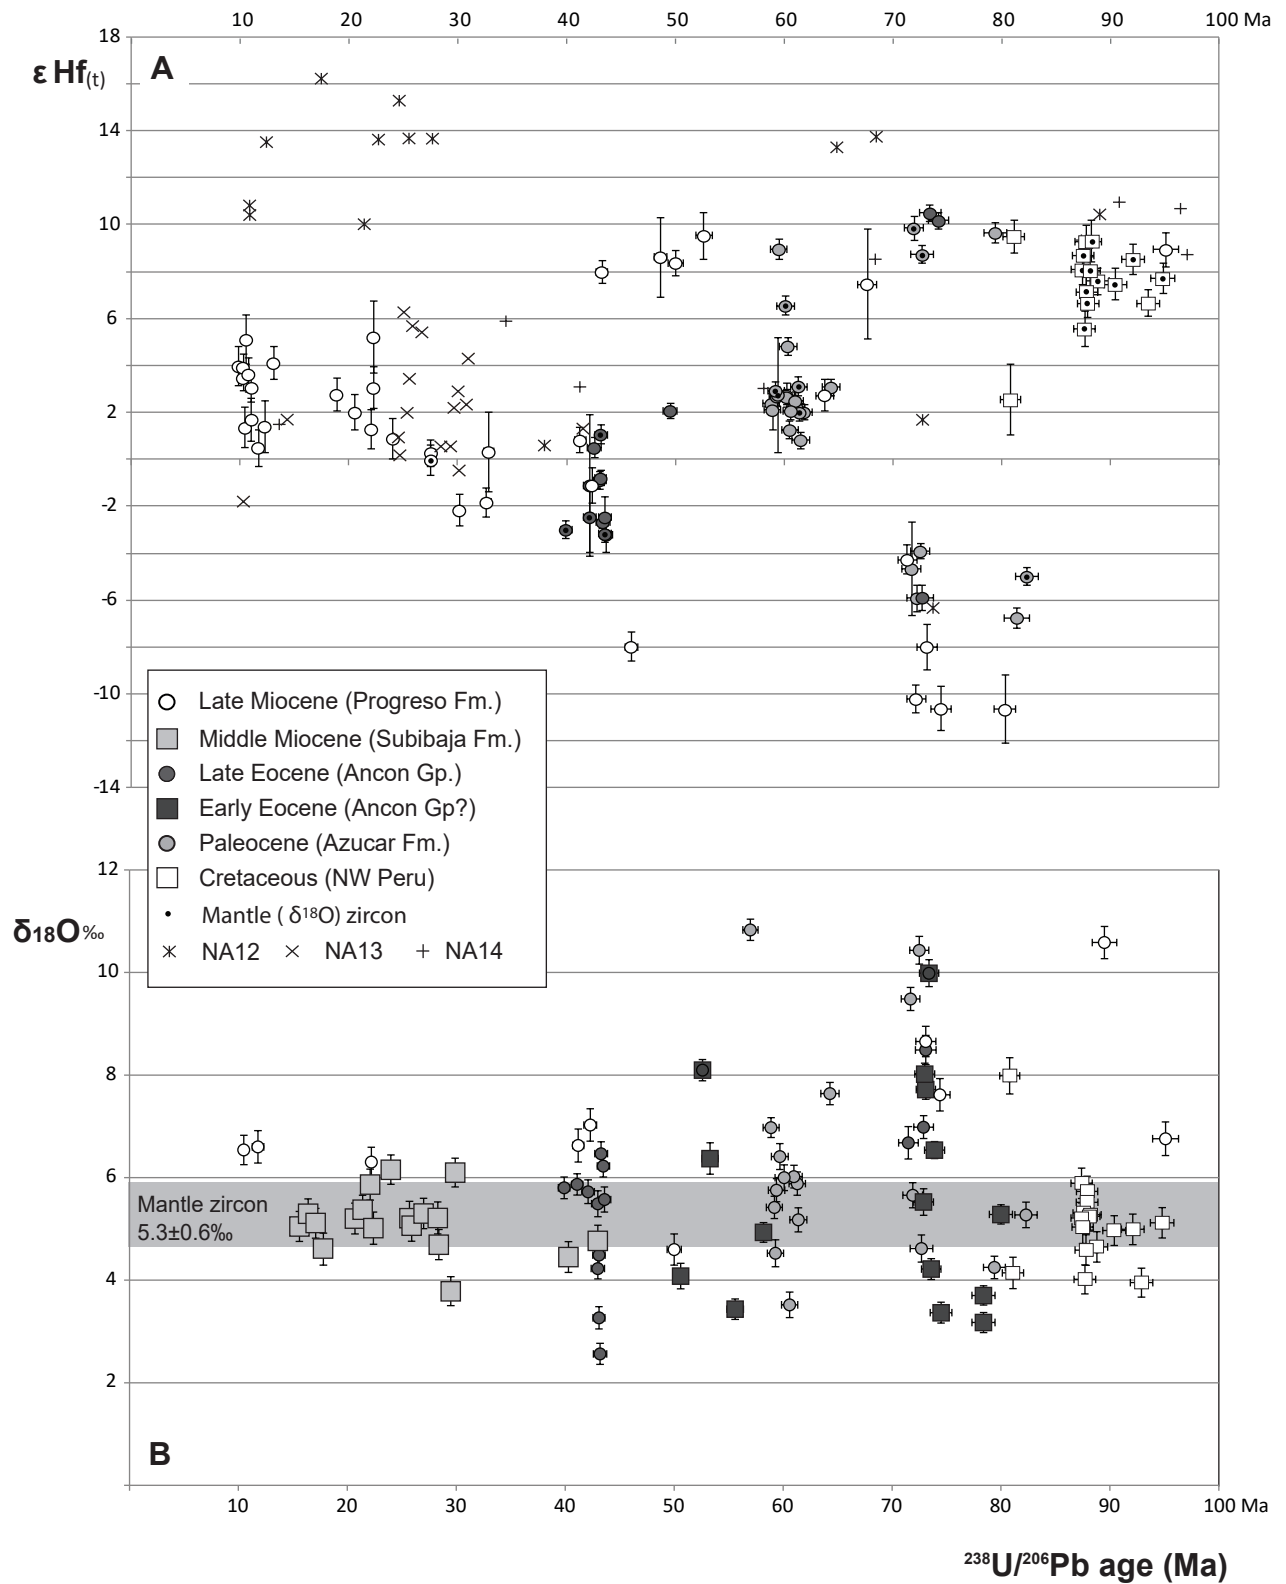

Witt et al., Sup.Fig.2

A

Witt et al., Sup.Fig.3

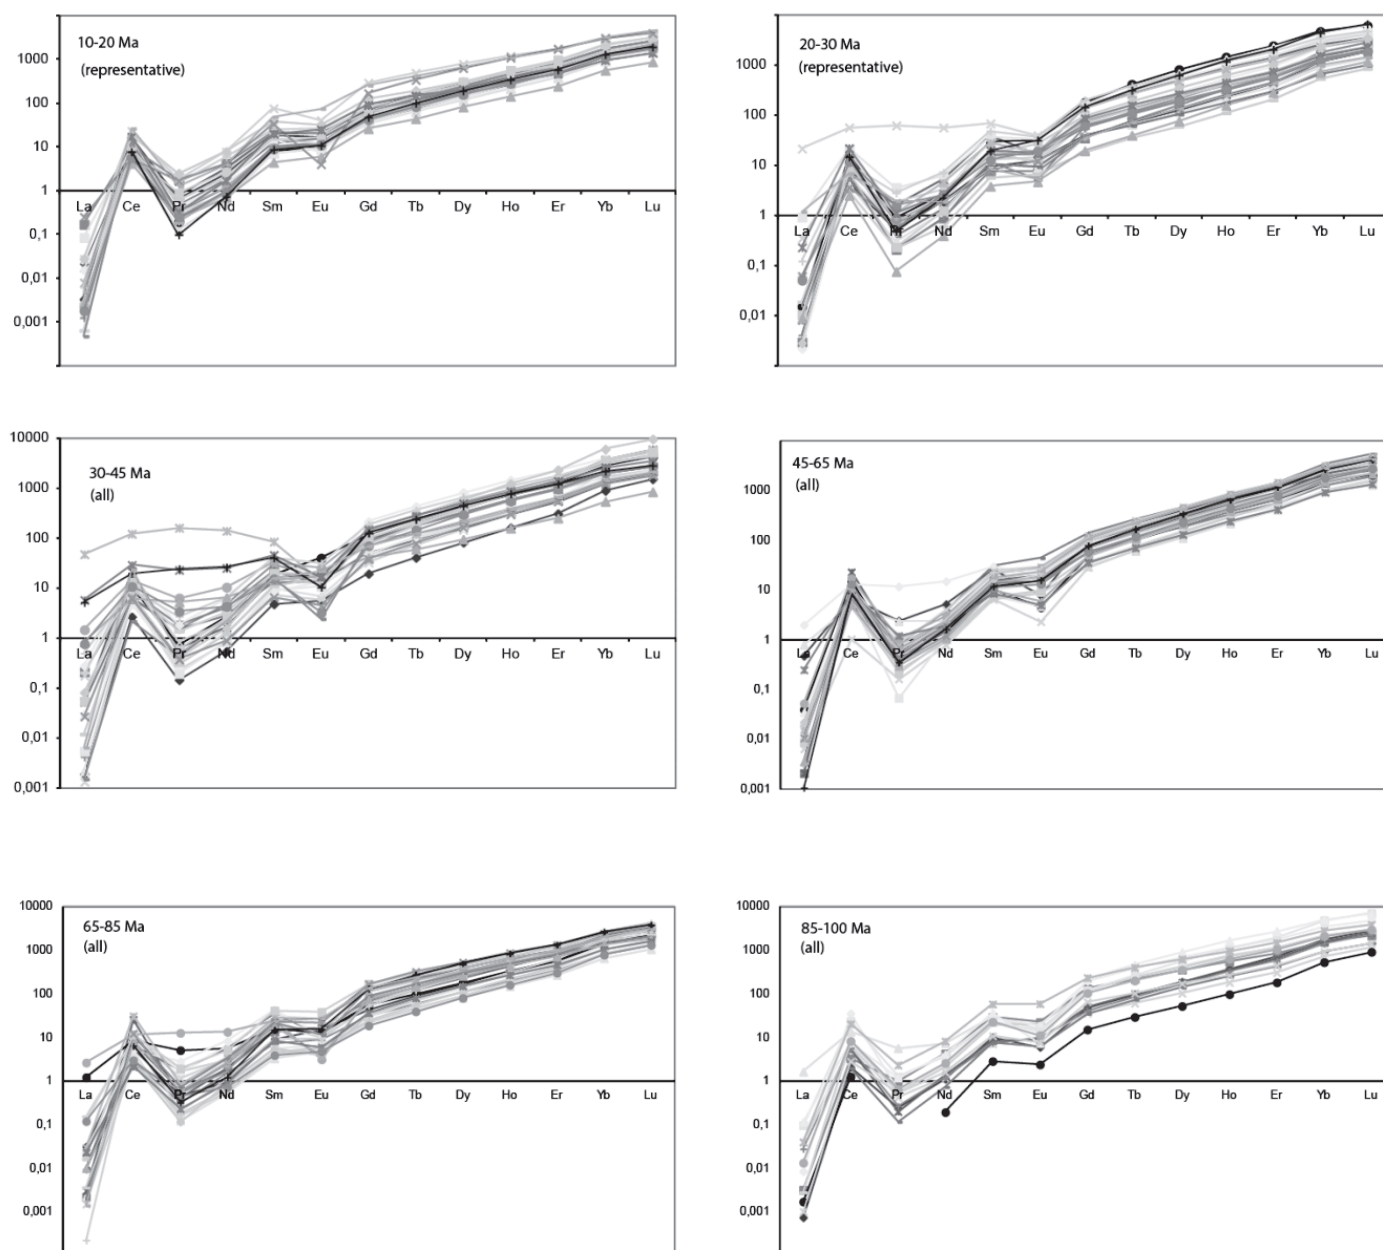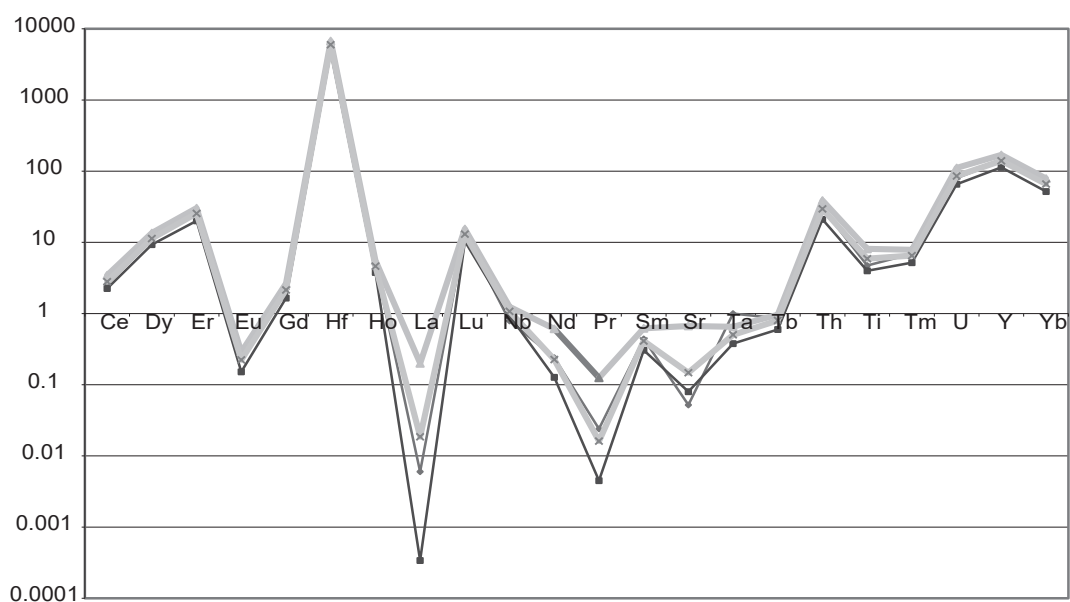

B

—x— Ref. Values  
 —●— Min. Meas. Value  
 —○— Max. Meas. Value  
 —●— Mean Value

C

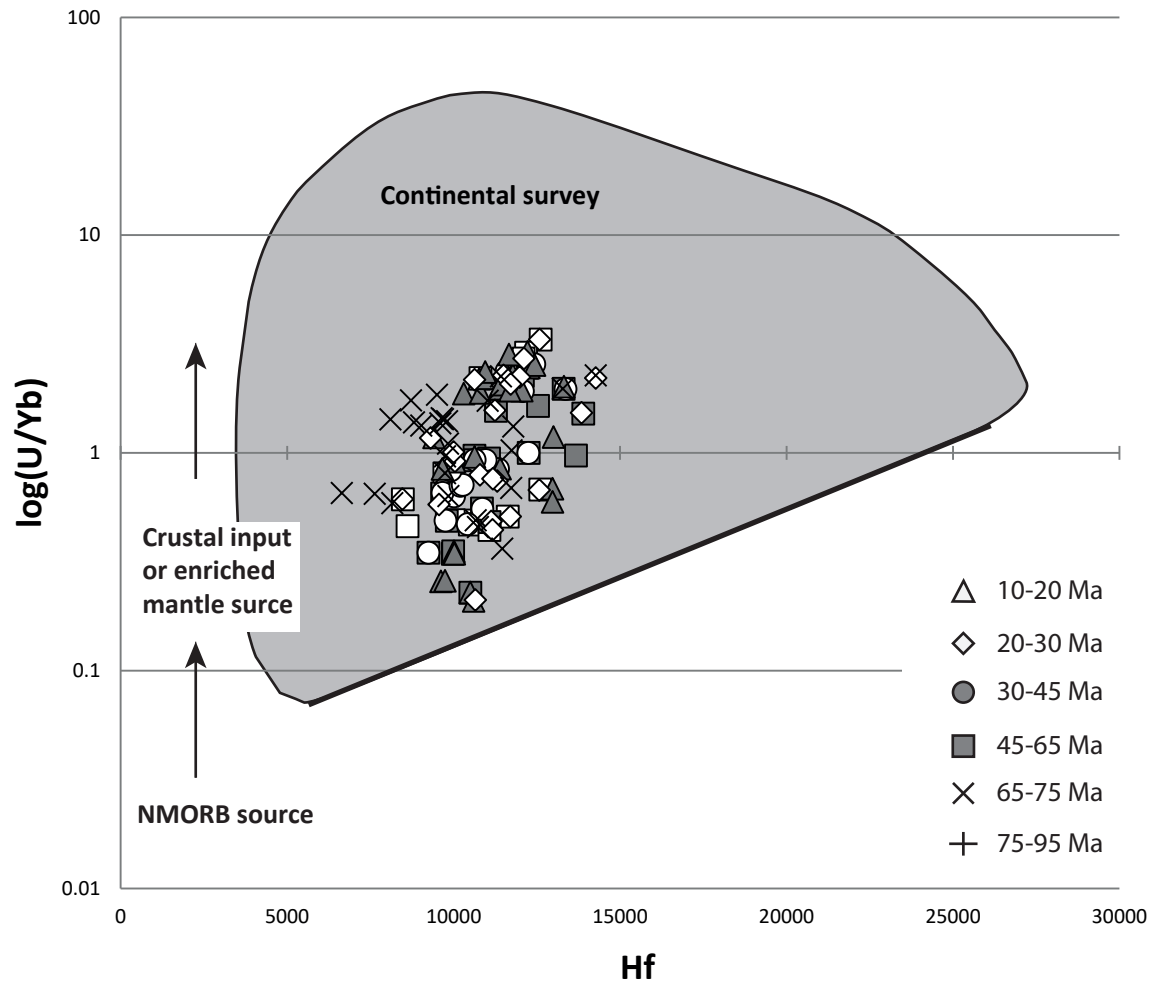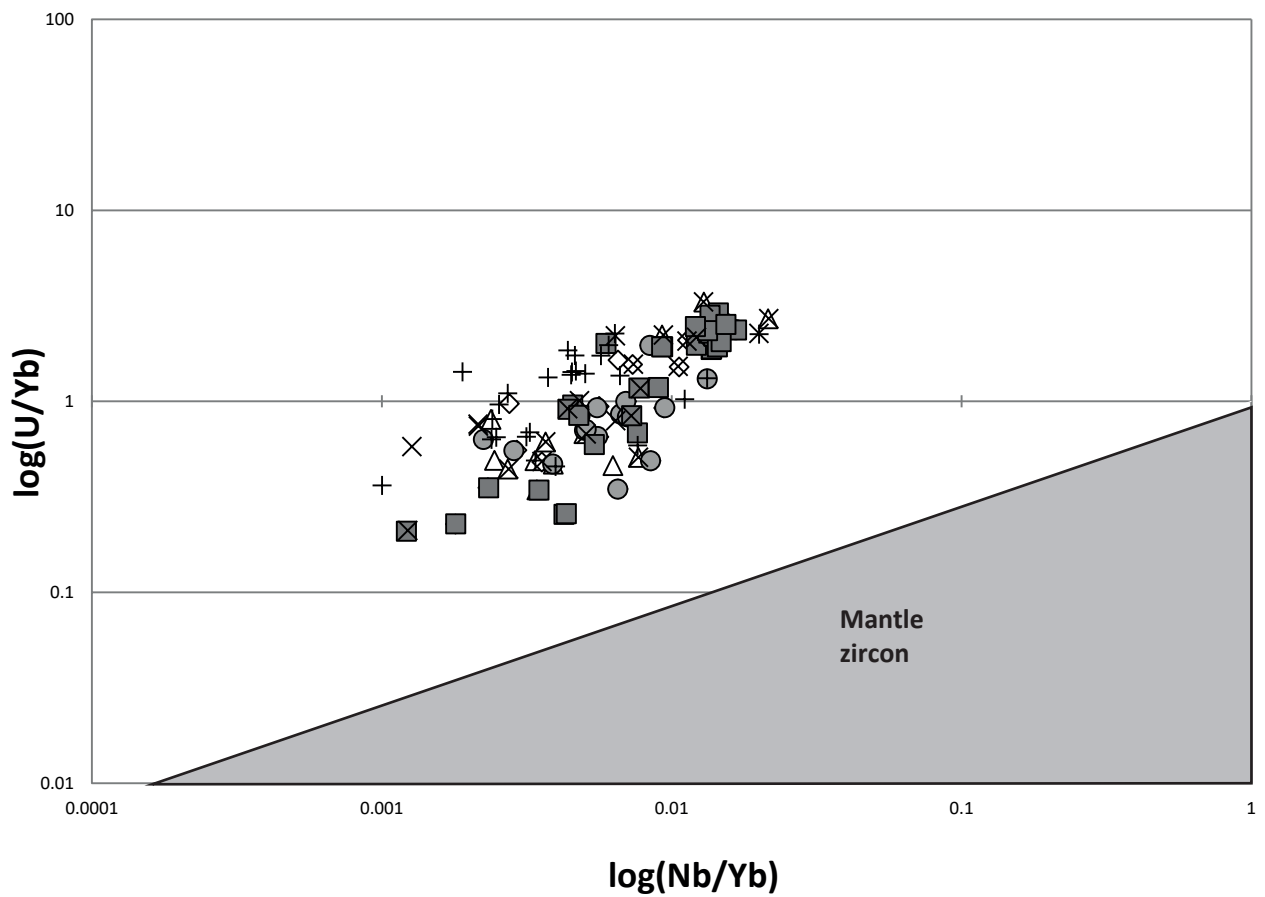

**D**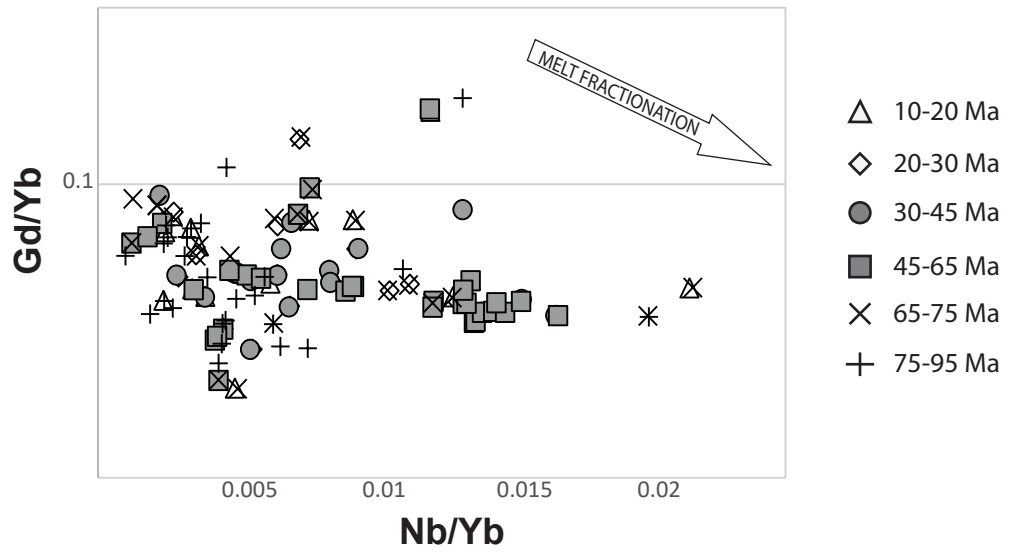**E**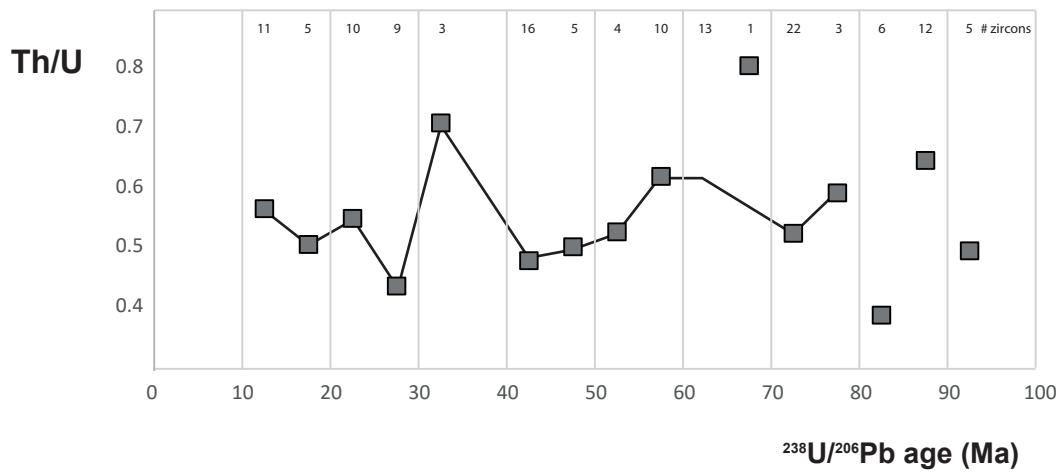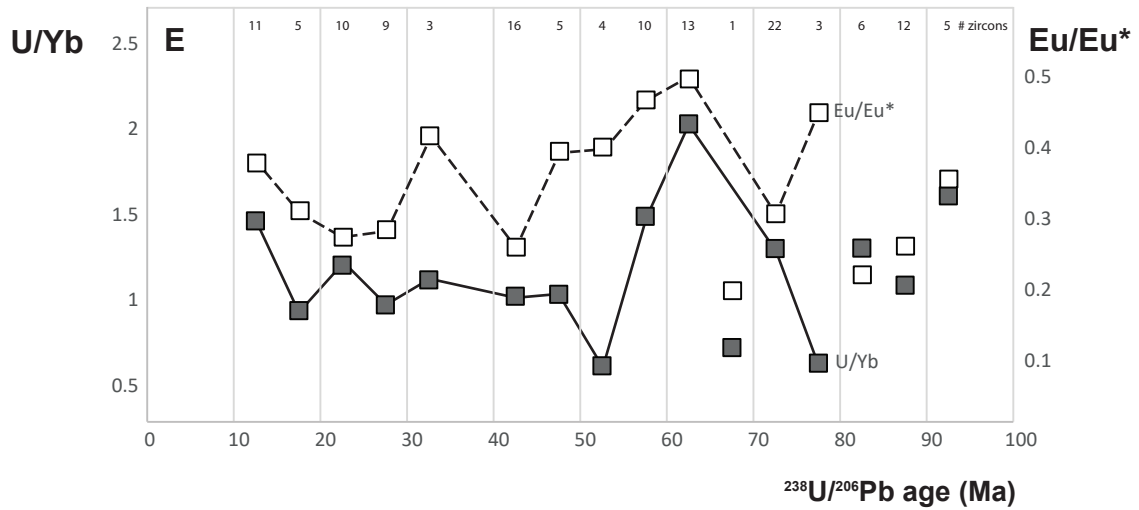

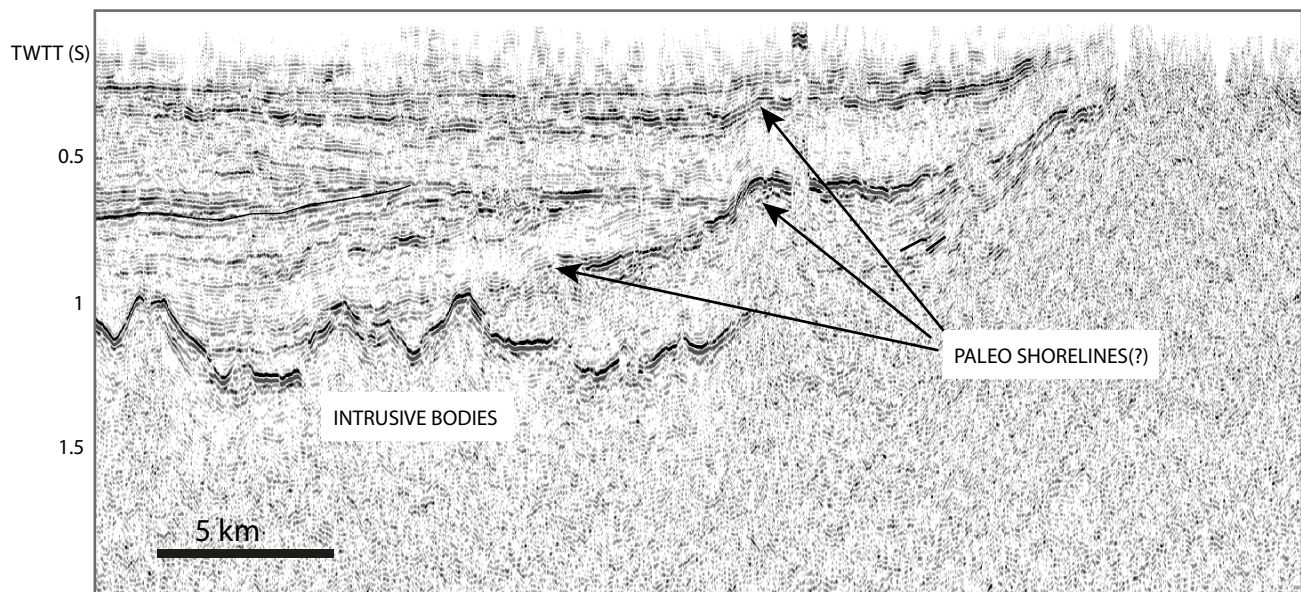

Witt et al., Sup.Fig.4



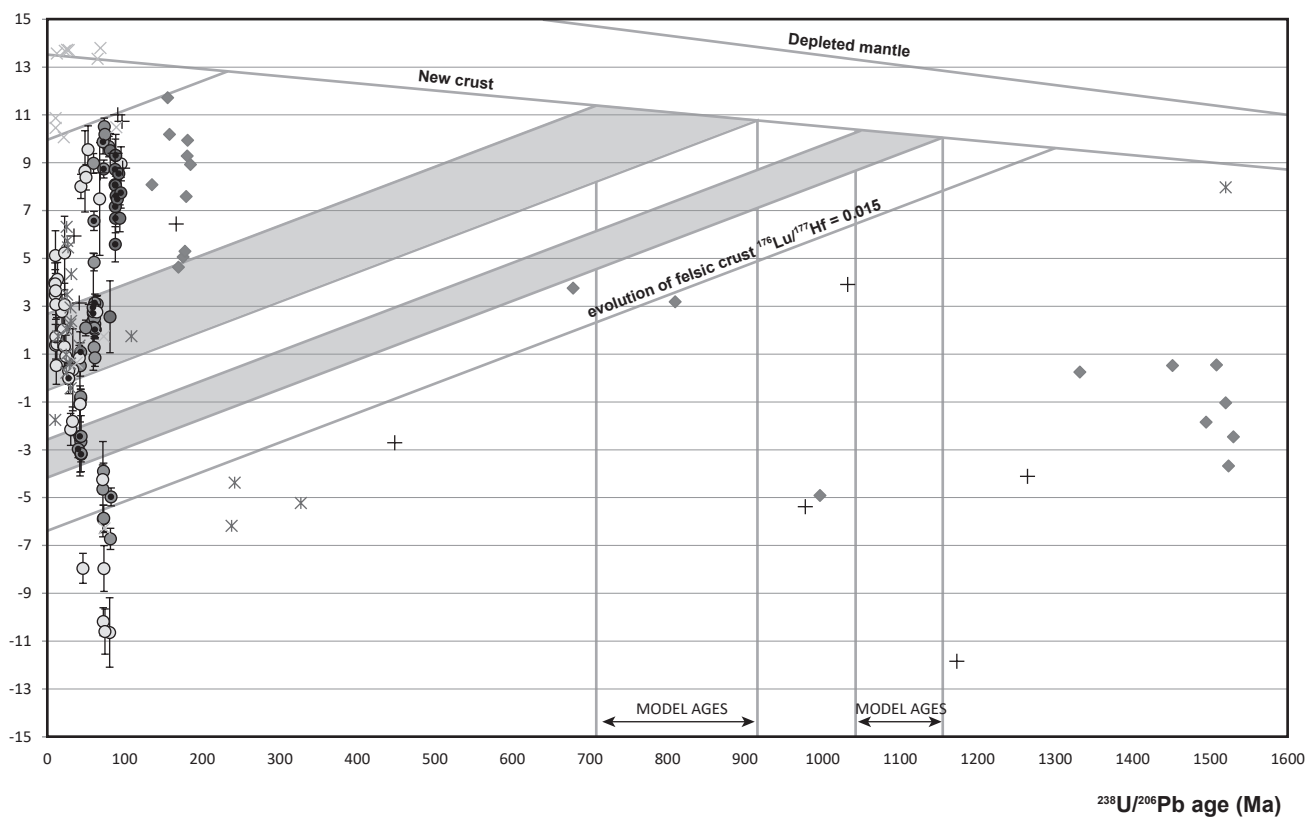

- Late Miocene (Progreso Fm.)
- Late Eocene (Ancon Gp.)
- Paleocene (Azucar Fm.)
- Cretaceous (NW Peru)
- ⊙ Mantle ( $\delta^{18}\text{O}$ ) zircon

**Pepper et al. (2015) samples**

- ◆ NA11    ✱ NA12
- ✱ NA13    + NA14

Witt et al., Sup.Fig.5
