# Supplementary material
Source: publisher figshare collection journal article supplement (https://gsapubs.figshare.com/articles/dataset/_/21136783)
Supplement: Supplementary file 1 [file 1]

## Sheet: Table S1
Sample	Formation	Rock type	Lat	Long	Younger cluster (Ma)
CP006	Azúcar	Sandstone	2°37'49.22''	80°26'53.79"	56.73 ± 0.84
CP212	Non attributed	Tuff	2° 6'53.33"	80°44'30.18"	53.5 ± 1.4
CP011	Ancon	Tuff	2°19'58.10"	80°53'25.92"	40.51 ± 0.52
CP405	Subibaja	Sandstone	2°11'40.41"	80°26'55.16"	16.02 ± 0.38
CP023	Progreso	Tuff	2°24'29.29"	80°22'22.69"	10.25 ± 0.33
CT005	Tortuga	Sandstone	5°16'50.65"	81°7'36.05"	80.29 ± 0.46

## Sheet: Table S2A
24 November 2021, GeOHeLiS Platform, Universite Rennes 1							Data for Tera-Wasserburg plot					Data for Wetherill plot					Dates
Identifier	Comments	f206c	206Pb	Uppm	Th/U	Pbppm	238U/206Pb	2se%	207Pb/206Pb	2se%	rho	207Pb/235U	2se%	206Pb/238U	2se%	Rho	207Pb/206Pb	2se (abs)	206Pb/238U	2se (abs)	207Pb/235U	2se (abs)	% conc
5281114	Zr1	0	32926.3	894.569	0.506457	195.372	72.0248	2.67347	0.0477901	2.68266	0.301741	0.0909101	2.72127	0.0138841	2.67347	0.982434	87.8262	63.6327	88.887	2.36006	88.3508	2.30263	100.607
6281114	Zr2	0	12922.4	373.715	0.157661	25.4585	76.0859	2.81352	0.0471627	3.4825	0.314152	0.0849131	3.48598	0.013143	2.81352	0.807096	56.4014	83.12	84.1735	2.35284	82.7536	2.77035	101.716
7281114	Zr3	0.405029	20454.1	585.991	0.228137	60.4997	71.5282	3.05169	0.051037	3.70972	0.430465	0.0975229	3.61408	0.0139805	3.05169	0.844391	241.466	85.5762	89.5	2.71239	94.4872	3.26078	94.7217
8281114	Zr4	0.177566	30388.2	826.914	0.228674	90.5907	72.8143	2.67484	0.0492007	2.67697	0.286272	0.0928298	2.72918	0.0137336	2.67484	0.980091	156.356	62.6948	87.9299	2.33602	90.136	2.35395	97.5524
9281114	Zr5	0.167127	31279.7	845.646	0.257173	101.193	71.2972	2.67496	0.0491555	2.725	0.335096	0.0945949	2.77139	0.0140258	2.67496	0.965208	154.204	63.846	89.7879	2.38515	91.7747	2.43188	97.8351
10281114	Zr6	0.0688077	21092.8	582.398	0.229056	61.8342	70.9597	2.91245	0.0483841	3.48137	0.332409	0.0934295	3.41302	0.0140925	2.91245	0.853335	117.034	82.1561	90.2119	2.60908	90.6931	2.96117	99.4695
11281114	Zr7	0.0595385	14700.4	444.858	0.208759	37.2743	77.2705	2.74671	0.048163	3.33873	0.310869	0.085375	3.36129	0.0129415	2.74671	0.817159	106.219	78.9437	82.8913	2.26221	83.1858	2.68465	99.646
12281114	Zr8	0.429776	18342.4	532.478	0.246108	58.0455	70.1574	2.95578	0.0512687	3.84844	0.345428	0.100057	3.78087	0.0142537	2.95578	0.781773	251.896	88.6145	91.2364	2.67775	96.8289	3.49185	94.2243
13281114	Zr9	0.097613	31506.1	914.07	0.266765	107.578	71.6531	2.67091	0.0485951	2.70988	0.357199	0.0931808	2.7291	0.0139561	2.67091	0.978679	127.284	63.8084	89.345	2.36987	90.4621	2.36202	98.7651
14281114	Zr10	0.129136	22819.2	760.828	0.211999	66.3266	74.1357	3.16331	0.0487851	4.10477	0.336022	0.0897438	3.94004	0.0134888	3.16331	0.802861	136.46	96.5486	86.373	2.71402	87.2647	3.29467	98.9782
18281114	Zr11	0.0276442	27659.7	984.05	0.208399	76.8303	71.8501	2.70898	0.0480352	2.76584	0.32236	0.0922055	2.84889	0.0139179	2.70898	0.95089	99.9369	65.4595	89.1017	2.39714	89.5558	2.44207	99.4929
19281114	Zr12	0.215206	9207.88	297.871	0.310175	34.7889	67.4983	3.00848	0.0496388	4.7848	0.389583	0.100437	4.51781	0.0148152	3.00848	0.665916	177.068	111.747	94.8043	2.8313	97.1799	4.18687	97.5555
20281114	Zr13	0.043606	44530.5	1696.1	0.507136	273.292	74.6155	2.6647	0.0480956	2.48434	0.296549	0.0888291	2.56272	0.013402	2.6647	1.0398	102.911	58.759	85.8212	2.27173	86.4121	2.12289	99.3163
21281114	Zr14	0.058846	24112.9	915.888	0.216363	70.0573	71.4375	2.71138	0.048293	2.86643	0.300812	0.0929859	2.90176	0.0139982	2.71138	0.934391	112.586	67.6831	89.6127	2.41293	90.2811	2.50666	99.2597
22281114	Zr15	0.0152097	10304.3	427.917	0.291297	38.9961	80.1032	2.80516	0.0477529	3.60275	0.328946	0.0820037	3.61826	0.0124839	2.80516	0.77528	85.9787	85.5191	79.9782	2.22966	80.027	2.78442	99.939
23281114	Zr16	0	20610.3	752.211	0.338094	88.1703	69.415	2.72265	0.0475942	3.06204	0.365702	0.0944448	3.08839	0.0144061	2.72265	0.881577	78.0749	72.7744	92.2051	2.49255	91.6355	2.70612	100.622
24281114	Zr17	1.15728	21924.1	850.518	0.200525	63.9824	70.6461	2.98798	0.0570277	4.00802	0.337666	0.110144	3.89678	0.0141551	2.98798	0.766782	491.612	88.4734	90.6096	2.68846	106.097	3.92572	85.4025
25281114	Zr18	0.0697483	26557.7	981.46	0.528571	173.093	73.6276	2.70777	0.048326	2.74209	0.307667	0.0903515	2.80768	0.0135819	2.70777	0.964416	114.199	64.7247	86.9651	2.339	87.8308	2.36237	99.0144
26281114	Zr19	0.0626687	25070.9	838.371	0.240833	80.7505	67.0543	2.69843	0.048441	2.78545	0.356311	0.0992126	2.83111	0.0149133	2.69843	0.953135	119.804	65.6807	95.4274	2.55607	96.0492	2.59461	99.3526
27281114	Zr20	0.176294	8994.49	310.108	0.305167	34.7709	70.9615	2.86812	0.0492368	3.92733	0.427702	0.0941131	3.77978	0.0140922	2.86812	0.758806	158.071	91.9983	90.2097	2.5693	91.3277	3.3013	98.7759
31281114	Zr21	0.0258656	18628.9	557.026	0.416321	99.8512	71.4067	2.73969	0.0480321	3.03712	0.283295	0.0919355	3.05363	0.0140043	2.73969	0.89719	99.7884	71.8893	89.6512	2.43916	89.3047	2.61056	100.388
32281114	Zr22	0.263016	19004.6	554.037	0.267085	68.471	70.2009	2.9557	0.0499445	3.86981	0.452104	0.097452	3.68782	0.0142448	2.9557	0.801477	191.367	90.0951	91.1802	2.67604	94.4217	3.32511	96.567
33281114	Zr23	0.22379	3712.83	113.996	0.19216	8.83146	79.0271	3.14045	0.0494286	5.80214	0.320917	0.0851348	5.5544	0.0126539	3.14045	0.565398	167.159	135.848	81.0605	2.52972	82.9611	4.4248	97.709
34281114	Zr24	0.118105	15483	421.45	0.23308	46.4065	69.9771	2.74561	0.0488007	3.03641	0.260922	0.0965218	3.11404	0.0142904	2.74561	0.881686	137.21	71.3745	91.4698	2.49367	93.5606	2.78332	97.7652
35281114	Zr25	0.169213	8375.26	228.151	0.201669	22.7529	69.9487	2.92247	0.0492069	4.2786	0.311453	0.0945728	4.22355	0.0142962	2.92247	0.691947	156.65	100.272	91.5066	2.65536	91.7542	3.70536	99.7301
36281114	Zr26	0.128597	7096.9	199.408	0.235127	20.832	72.2364	2.8849	0.0488264	4.39469	0.367821	0.0913211	4.19819	0.0138434	2.8849	0.687177	138.448	103.346	88.6285	2.53934	88.7332	3.56707	99.882
37281114	Zr27	0.0578898	7601.93	204.336	0.214845	20.3241	70.1429	2.84648	0.0483186	4.09006	0.286217	0.0942557	4.06955	0.0142566	2.84648	0.699458	113.837	96.6068	91.255	2.57926	91.46	3.55932	99.7758
38281114	Zr28	0.163427	21088.8	554.654	0.242643	64.8062	66.3932	2.70781	0.0492598	2.94871	0.354558	0.101477	2.92552	0.0150618	2.70781	0.925582	159.162	69.0301	96.3705	2.59012	98.1388	2.73669	98.1981
39281114	Zr29	0.129223	23186.5	662.391	0.257613	75.1243	71.0403	2.68502	0.0488614	2.84501	0.307699	0.0945852	2.8931	0.0140765	2.68502	0.928076	140.129	66.8344	90.1104	2.40265	91.7657	2.53844	98.1961
40281114	Zr30	0.0777835	21282.9	632.536	0.362415	108.746	72.3022	2.78506	0.0484217	2.92297	0.289867	0.0916941	3.0141	0.0138308	2.78506	0.924011	118.864	68.9391	88.5484	2.44926	89.0803	2.57056	99.4029
45281114	Zr31	0.126797	16371.7	557.059	0.245063	50.3713	70.1685	2.74353	0.0488646	3.10889	0.395824	0.0950567	3.05875	0.0142514	2.74353	0.896944	140.285	73.0385	91.222	2.48508	92.2031	2.69601	98.936
46281114	Zr32	0.376596	18795	578.218	0.259339	64.1171	65.7817	2.8402	0.0509697	3.67662	0.365906	0.10674	3.67143	0.0152018	2.8402	0.773595	238.422	84.8582	97.2597	2.74163	102.979	3.59542	94.446
47281114	Zr33	0.17346	37162.9	1236.19	0.3515	170.581	71.7994	2.65961	0.0491932	2.60344	0.299218	0.0940817	2.66964	0.0139277	2.65961	0.996243	155.995	60.9752	89.1642	2.3551	91.2985	2.33098	97.6623
48281114	Zr34	0.0720144	42748.5	1340.61	0.508187	264.111	66.8445	2.67065	0.0485212	2.62466	0.327996	0.0997642	2.67221	0.0149601	2.67065	0.999417	123.701	61.841	95.7247	2.53759	96.5586	2.46137	99.1363
49281114	Zr35	0.0453389	27214.3	880.835	0.27737	96.0617	71.6398	2.68497	0.0481808	2.71994	0.279997	0.0924952	2.80833	0.0139587	2.68497	0.956074	107.092	64.2863	89.3615	2.38277	89.8251	2.41423	99.4839
50281114	Zr36	0.120406	20878.3	662.637	0.277157	71.8298	72.2379	2.71351	0.0487614	2.87422	0.308348	0.092209	2.89157	0.0138432	2.71351	0.938419	135.318	67.5814	88.6267	2.38844	89.5591	2.47875	98.9589
51281114	Zr37	0.823312	4458.13	179.986	0.369221	20.178	91.5435	3.07945	0.0539579	5.50465	0.401986	0.0772223	5.0991	0.0109238	3.07945	0.60392	368.28	124.26	70.0373	2.14509	75.5301	3.71161	92.7277
52281114	Zr38	0.148566	12961.3	399.908	0.294419	52.161	70.7881	2.78078	0.0490213	3.30601	0.26618	0.0950081	3.35422	0.0141267	2.78078	0.829041	147.795	77.5683	90.4291	2.49708	92.1579	2.95505	98.1241
53281114	Zr39	0.19155	10200.7	305.04	0.274913	34.0819	70.3649	2.80781	0.0493733	3.53498	0.329906	0.0956032	3.49174	0.0142116	2.80781	0.804131	164.543	82.693	90.9691	2.53631	92.7097	3.0938	98.1226
5281114.d	Zr40	0.330708	10946.9	340.786	0.285581	41.7822	67.0754	2.43935	0.0505675	3.74765	0.34855	0.103757	4.70646	0.0149086	2.43935	0.518298	220.123	86.7887	95.3976	2.30995	100.239	4.49234	95.1703
6281114.d	Zr41	0.13413	25631	864.452	0.250985	88.1671	68.7893	2.3285	0.0489596	3.19495	0.286428	0.0977773	4.35208	0.0145371	2.3285	0.535032	144.843	74.9999	93.0378	2.15083	94.7225	3.93597	98.2214
7281114.d	Zr42	0.203202	31008.4	994.768	0.201339	81.9772	66.4081	2.26581	0.049575	3.03622	0.287065	0.102441	4.21533	0.0150584	2.26581	0.537516	174.066	70.8863	96.3491	2.16685	99.0268	3.97723	97.296
8281114.d	Zr43	0.0891033	10535.3	342.729	0.315846	40.1331	70.6398	2.25951	0.0485534	3.36406	0.398492	0.0930597	4.31711	0.0141563	2.25951	0.523384	125.26	79.2623	90.6177	2.03319	90.3496	3.73201	100.297
9281114.d	Zr44	0.262668	23850	758.574	0.301034	94.5914	75.4614	2.31092	0.0498137	3.09489	0.352342	0.0904114	4.19518	0.0132518	2.31092	0.55085	185.264	72.1094	84.8655	1.94832	87.8866	3.53196	96.5626
10281114.d	Zr45	0.131443	18288.3	574.631	0.517348	119.647	72.4747	2.15937	0.0488432	2.62343	0.351933	0.0922533	3.8774	0.0137979	2.15937	0.556911	139.253	61.6341	88.339	1.89455	89.6003	3.3253	98.5924
11281114.d	Zr46	0.432598	10887.2	316.569	0.328314	46.3014	70.7819	2.52756	0.0512748	4.09245	0.20532	0.0994624	5.09092	0.0141279	2.52756	0.496483	252.169	94.24	90.4369	2.26989	96.28	4.67636	93.9312
12281114.d	Zr47	0.20444	23668.6	747.299	0.281146	89.0524	73.4451	2.10658	0.0493987	2.30879	0.364814	0.0928366	3.74083	0.0136156	2.10658	0.563131	165.749	53.9722	87.1797	1.82414	90.1424	3.22673	96.7133
13281114.d	Zr48	0.236298	18543	585.86	0.33104	76.2746	70.3916	2.33943	0.0497276	3.26643	0.366425	0.0964597	4.26732	0.0142063	2.33943	0.548221	181.232	76.168	90.935	2.11243	93.5031	3.81189	97.2534
14281114.d	Zr49	0.863746	1584.46	64.5155	0.25785	4.98834	90.3136	3.91439	0.0542976	10.8864	0.300487	0.0762454	10.6032	0.0110725	3.91439	0.369171	382.402	246.479	70.9858	2.76342	74.6088	7.6274	95.144
18281114.d	Zr50	0.0201492	26996.3	940.26	0.60476	207.73	72.631	2.13626	0.0479565	2.30807	0.32129	0.0903734	3.73812	0.0137682	2.13626	0.57148	96.059	54.6565	88.1503	1.8703	87.8512	3.14594	100.34
19281114.d	Zr51	0	16339.6	549.419	0.537084	129.529	70.9029	2.20636	0.0476767	2.79736	0.340556	0.0919045	4.00302	0.0141038	2.20636	0.551173	82.1867	66.426	90.2838	1.9781	89.276	3.42115	101.129
20281114.d	Zr52	0.235314	11791.4	411.696	0.209469	33.6202	68.8859	2.80818	0.0497599	4.79997	0.358852	0.097477	5.44427	0.0145168	2.80818	0.515805	182.743	111.986	92.9083	2.59032	94.4448	4.90999	98.3731
21281114.d	Zr53	0.286349	10671.7	347.247	0.224358	32.9291	67.5657	2.29975	0.0502015	3.31528	0.33844	0.100621	4.32504	0.0148004	2.29975	0.531728	203.289	76.9971	94.7104	2.16218	97.349	4.01487	97.2896
22281114.d	Zr54	0.00642178	27143.1	886.877	0.255583	91.2067	69.7387	2.14544	0.0479209	2.23782	0.298257	0.0945551	3.72711	0.0143392	2.14544	0.575631	94.2999	53.0094	91.7802	1.95514	91.7378	3.26927	100.046
23281114.d	Zr55	0.205371	16694.3	546.598	0.296079	64.3342	68.8884	2.28425	0.0495222	3.16049	0.316174	0.0982846	4.25255	0.0145162	2.28425	0.537149	171.579	73.8251	92.9049	2.10696	95.1917	3.86413	97.5977
24281114.d	Zr56	0.247162	14731.7	489.263	0.244563	46.4183	69.9019	2.56659	0.0498266	3.96427	0.268308	0.0973669	4.91097	0.0143058	2.56659	0.522623	185.866	92.3918	91.5674	2.33354	94.3429	4.42445	97.0581
25281114.d	Zr57	0.190362	7647.09	261.576	0.27892	27.4188	69.4485	2.72212	0.049388	5.70956	0.332313	0.0957715	6.20954	0.0143992	2.72212	0.438377	165.241	133.719	92.161	2.49089	92.8656	5.51074	99.2413
26281114.d	Zr58	0.288511	2967.46	106.031	0.42971	16.3907	77.9657	2.77918	0.0499639	6.1832	0.480936	0.0849193	6.56074	0.0128262	2.77918	0.423608	192.269	144.146	82.157	2.2688	82.7594	5.21429	99.2721
27281114.d	Zr59	0.0978751	20035	630.595	0.248841	65.1395	69.8123	2.14633	0.0486445	2.44798	0.302038	0.0956813	3.83906	0.0143241	2.14633	0.559078	129.675	57.611	91.6841	1.95392	92.782	3.40408	98.8166
31281114.d	Zr60	0.104217	22684.9	771.274	0.265696	78.9021	71.5206	2.13899	0.0486508	2.35437	0.332685	0.0932411	3.7741	0.013982	2.13899	0.566755	129.98	55.4032	89.5094	1.90137	90.5181	3.26841	98.8855
32281114.d	Zr61	0.1432	19241.5	658.92	0.267947	68.2539	69.6569	2.16431	0.0490083	2.52772	0.308751	0.0966333	3.87556	0.0143561	2.16431	0.55845	147.172	59.2968	91.8872	1.97462	93.6639	3.46762	98.1032
33281114.d	Zr62	0.0676295	24384.3	839.121	0.317838	99.6037	67.2152	2.16443	0.0484758	2.3624	0.333989	0.0990429	3.78761	0.0148776	2.16443	0.571449	121.494	55.6799	95.2006	2.04541	95.8925	3.46582	99.2785
34281114.d	Zr63	0.135635	19266.8	704.977	0.309714	81.7676	71.7289	2.15936	0.0488949	2.4005	0.304864	0.0933047	3.80631	0.0139414	2.15936	0.567311	141.737	56.3668	89.2513	1.91398	90.5772	3.29836	98.5361
35281114.d	Zr64	0.217267	10170.2	394.931	0.50993	71.6863	75.3307	2.2995	0.0494566	3.31318	0.341628	0.0900975	4.38471	0.0132748	2.2995	0.524435	168.485	77.4406	85.0118	1.94201	87.5942	3.67977	97.0518
36281114.d	Zr65	0.243497	7586.26	290.134	0.365054	36.0616	72.6338	2.36634	0.0497281	3.7354	0.356635	0.0929639	4.64935	0.0137677	2.36634	0.508962	181.258	87.1214	88.1469	2.07166	90.2606	4.01544	97.6582
37281114.d	Zr66	0.231967	11913.1	438.854	0.20112	30.7753	69.1175	2.24527	0.049727	3.07009	0.395876	0.0977269	4.13674	0.0144681	2.24527	0.542763	181.205	71.5842	92.5992	2.06424	94.6759	3.73947	97.8065
38281114.d	Zr67	0.0649497	20468.1	755.291	0.27084	82.2748	70.7654	2.14519	0.0483585	2.60958	0.320199	0.0936432	3.907	0.0141312	2.14519	0.549065	115.784	61.5758	90.458	1.92695	90.8915	3.39684	99.523
39281114.d	Zr68	0.201733	35117.8	1470.04	0.350175	157.606	74.5114	2.46185	0.0493522	3.03621	0.29779	0.0910203	4.29045	0.0134208	2.46185	0.573799	163.546	71.0234	85.9404	2.10169	88.4534	3.63446	97.159
40281114.d	Zr69	0.0236483	21483	742.396	0.302238	86.5931	68.6822	2.17411	0.0480859	2.46683	0.316544	0.0954744	3.81313	0.0145598	2.17411	0.570164	102.434	58.3495	93.1818	2.01131	92.5902	3.37441	100.639
44281114.d	Zr70	0.103982	15717.9	506.495	0.17351	36.7475	79.6744	2.18262	0.0484654	2.71961	0.366802	0.0828285	3.93306	0.0125511	2.18262	0.554943	120.988	64.1126	80.406	1.74406	80.8008	3.05479	99.5114
45281114.d	Zr71	0.233948	19281.3	572.739	0.235329	59.4221	75.4972	2.11751	0.0495852	2.4483	0.348525	0.0901424	3.80284	0.0132455	2.11751	0.556823	174.544	57.1434	84.8255	1.78442	87.636	3.1929	96.7931
46281114.d	Zr72	0.148696	24739.8	697.424	0.263658	88.417	71.6591	2.11612	0.0490002	2.28704	0.318047	0.0941039	3.74094	0.013955	2.11612	0.565665	146.787	53.6505	89.3375	1.87745	91.3191	3.26709	97.83
47281114.d	Zr73	0.52011	22981	690.824	0.267617	88.6521	71.2146	2.56098	0.051958	3.68779	0.215428	0.0994454	4.77872	0.0140421	2.56098	0.535913	282.531	84.4409	89.8913	2.28612	96.2643	4.38889	93.3797
48281114.d	Zr74	0.226212	18645.9	517.748	0.260877	68.4106	69.5526	2.1443	0.0496697	2.49646	0.34397	0.0977704	3.83072	0.0143776	2.1443	0.559764	178.515	58.2259	92.024	1.95925	94.7162	3.46424	97.1576
49281114.d	Zr75	0.309631	6540.7	196.533	0.163639	13.7414	75.1035	2.3746	0.0501944	3.99653	0.290625	0.0912356	4.94629	0.013315	2.3746	0.480076	202.959	92.854	85.2674	2.01142	88.6537	4.19911	96.1802
50281114.d	Zr76	0	27134.4	749.974	0.33482	131.84	67.0045	2.2379	0.0478013	2.28296	0.239622	0.0981057	3.81099	0.0149244	2.2379	0.587223	88.3795	54.1391	95.4978	2.12139	95.0262	3.45716	100.496
51281114.d	Zr77	0.225887	8640.73	245.011	0.232559	25.7043	69.7518	2.29754	0.0496618	3.39232	0.37312	0.0967422	4.40941	0.0143365	2.29754	0.521054	178.146	79.1525	91.7631	2.09336	93.7647	3.94934	97.8653
52281114.d	Zr78	0.55948	14045.8	403.916	0.245477	45.7428	72.299	2.64811	0.052243	4.19583	0.361205	0.0985453	4.89327	0.0138314	2.64811	0.541175	295.032	95.8826	88.5522	2.32893	95.4326	4.45707	92.7903
53281114.d	Zr79	0.253064	8580.59	256.589	0.220973	25.896	67.9104	2.40195	0.0499276	3.89298	0.344029	0.099718	4.7948	0.0147253	2.40195	0.500949	190.579	90.6485	94.2331	2.24697	96.516	4.41464	97.6347
f206 % =(207Pb/206Pbm - 207Pb/206Pb*)/(207Pb/206Pbc-207Pb/206Pb*)x100
if Age206Pb/238U < 1000Ma concordance % = (Age206Pb/238U / Age207Pb/235U) * 100 ; else concordance % = (Age207Pb/235U / Age207Pb/206Pb) * 100
Uncertainties on ages include secondary standard uncertainty propagation as proposed by Horstwood et al., 2016

## Sheet: Table S2B
Laboratory & Sample Preparation
Laboratory name	GeOHeLiS Analytical Platform, OSUR, Univ Rennes 1, France
Sample type/mineral	Zircon
Sample preparation	Conventional mineral separation, 1-inch resin mount, 1mm polish to finish
Imaging	CL: RELION CL instrument, Olympus Microscope BX51WI, Leica Color Camera DFC 420C
Laser ablation system
Make, Model & type	ESI NWR193UC, Excimer
Ablation cell	ESI NWR TwoVol2
Laser wavelength	193 nm
Pulse width	< 5 ns
Fluence	6.2 J/cm2
Repetition rate	3Hz
Spot size	20 μm
Sampling mode / pattern	Single spot
Carrier gas	100% He, Ar make-up gas and N2 (3 ml/mn) combined using in-house smoothing device
Background collection	20 seconds
Ablation duration	60 seconds
Wash-out delay	15 seconds
Cell carrier gas flow (He)	0.80 l/min
ICP-MS Instrument
Make, Model & type	Agilent 7700x, Q-ICP-MS
Sample introduction	Via conventional tubing
RF power	1350W
Sampler, skimmer cones	Ni
Extraction lenses	X type
Make-up gas flow (Ar)	0.85 l/min
Detection system	Single collector secondary electron multiplier
Data acquisition protocol	Time-resolved analysis
Scanning mode	Peak hopping, one point per peak
Detector mode	Pulse counting, dead time correction applied, and analog mode when signal intensity > ~ 106 cps
Masses measured	204(Hg + Pb), 206Pb, 207Pb, 208Pb, 232Th, 238U
Integration time per peak	10-30 ms (207Pb)
Sensitivity / Efficiency	23000 cps/ppm Pb (50µm, 10Hz)
Data Processing
Gas blank	20 seconds on-peak
Calibration strategy	GJ1 zircon standard used as primary reference material, Plešovice used as secondary reference material (quality control)
Common-Pb correction, composition and uncertainty	No common-Pb correction.
Reference Material info	GJ1 (Jackson et al., 2004), Plešovice (Slama et al., 2008)
Data processing package	Iolite (Paton et al., 2010)
Uncertainty level and propagation	Ages are quoted at 2 sigma absolute, propagation is by quadratic addition according to Horstwood et al. (2016). Reproducibility and age uncertainty of reference material are propagated.
Quality control / Validation	Plešovice: concordia age = 336 ± 0.8 Ma (N=10; MSWD=2.9)
References :
Horstwood MSA, Košler J, Gehrels G, Jackson SE, McLean NM, Paton C, Pearson NJ, Sircombe K, Sylvester P, Vermeesch P, Bowring JF, Condon DJ, Schoene B (2016) Community-Derived Standards for LA-ICP-MS U-(Th-)Pb Geochronology – Uncertainty Propagation, Age Interpretation and Data Reporting. Geostandards and Geoanalytical Research 40(3):311-332 doi:10.1111/j.1751-908X.2016.0379.x
Jackson SE, Pearson NJ, Griffin WL, Belousova EA (2004) The application of laser ablation-inductively coupled plasma-mass spectrometry to in situ U–Pb zircon geochronology. Chemical Geology 211:47-69
Paton C, Woodhead JD, Hellstrom JC, Hergt JM, Greig A, Maas R (2010) Improved laser ablation U-Pb zircon geochronology through robust downhole fractionation correction. Geochemistry, Geophysics, Geosystems 11(3) doi:10.1029/2009GC002618
Sláma J, Kosler J, Condon DJ, Crowley JL, Gerdes A, Hanchar JM, Horstwood MSA, Morris GA, Nasdala L, Norberg N, Schaltegger U, Schoene B, Tubrett MN, Whitehouse MJ (2008) Plesovice zircon -- A new natural reference material for U-Pb and Hf isotopic microanalysis. Chemical Geology 249(1-2):1-35

## Sheet: Table S3A
Samples
Analysis	# Cycles integrated	178Hf/177Hf	2σ	174Hf/177Hf	2σ	176Lu/177Hf	2σ	176Hf/177Hf	2σ	Age (Ma)	176Hf/177Hf(t)	176Hf/177HfCHUR(t)	εHf(t)	2σ
Northwest Peru. Cretaceous. Tortuga Formation
CT005-1	120	1.47198	0.000101766	0.171055	0.00805379	0.00586527	0.000166082	0.282924	1.70206e-05	87.9	0.282915	0.28273	6.53687	0.601989
CT005-5	120	1.47185	0.00010613	0.102136	0.00315799	0.00425492	8.31877e-05	0.282951	1.72275e-05	87.9	0.282944	0.28273	7.59185	0.609311
CT005-12	120	1.47174	0.000125379	0.0780503	0.00226942	0.0033105	3.90868e-05	0.282946	1.81267e-05	94.8	0.28294	0.282725	7.59423	0.641129
CT005-14	120	1.47181	8.77305e-05	0.122314	0.00261001	0.00385224	9.34272e-05	0.282979	1.5686e-05	87.5	0.282973	0.28273	8.58243	0.554792
CT005-15	110	1.47202	0.000253456	0.0781754	0.0037407	0.00237333	0.000130632	0.282807	4.24816e-05	80.8	0.282803	0.282734	2.43184	1.50251
CT005-17	120	1.47171	0.000111029	0.137701	0.00363754	0.00463203	7.8725e-05	0.282961	1.76092e-05	88.1	0.282953	0.28273	7.91138	0.622811
CT005-18	113	1.4717	0.000115623	0.313844	0.0240784	0.00882978	0.000464028	0.282899	2.08299e-05	87.6	0.282884	0.28273	5.44979	0.736704
CT005-19	120	1.47186	0.000113325	0.164563	0.00348915	0.00548957	8.31556e-05	0.282921	1.58617e-05	93.5	0.282911	0.282726	6.53292	0.561009
CT005-22	102	1.47169	0.000126119	0.115383	0.00451973	0.00363175	0.000165962	0.282995	1.94246e-05	87.7	0.282989	0.28273	9.16245	0.687023
CT005-23	120	1.47157	0.000103392	0.103938	0.00458323	0.00356725	0.000186022	0.283005	2.01233e-05	81.1	0.282999	0.282734	9.3803	0.711725
CT005-24	120	1.47178	0.000112246	0.069659	0.0039636	0.00322304	0.000142248	0.28297	1.77344e-05	92.1	0.282965	0.282727	8.39884	0.627248
CT005-30	120	1.47186	0.000101092	0.104411	0.00348697	0.00338643	0.000135045	0.28296	1.81581e-05	87.4	0.282955	0.28273	7.94878	0.64223
CT005-35	120	1.47151	0.000102384	0.541974	0.0107146	0.0114337	9.48637e-05	0.282841	2.49615e-05	92.9	0.282821	0.282727	3.32766	0.882824
CT005-51	100	1.47181	0.000297526	0.265932	0.0240843	0.00835209	0.000438311	0.283003	2.47153e-05	88.2	0.282989	0.28273	9.17332	0.874125
CT005-52	105	1.47193	0.000134463	0.167425	0.00744828	0.00531708	0.000181799	0.282949	1.61504e-05	88.8	0.282941	0.282729	7.47693	0.571215
CT005-53	120	1.47188	0.000111536	0.0728239	0.00343809	0.00350222	0.000125361	0.282934	1.74353e-05	87.8	0.282929	0.28273	7.02611	0.616663
CT005-80	120	1.47185	0.00010913	0.064001	0.00252431	0.00257334	7.04956e-05	0.28294	1.89453e-05	90.4	0.282936	0.282728	7.33617	0.67008
SW Ecuador. Paleocene. Azucar Formation
CP006-21	120	1.47858	7.63927e-05	0.0557186	0.00262155	0.00257999	0.000113334	0.282783	1.10004e-05	60.5	0.28278	0.282747	1.1807	0.389051
CP006-22	120	1.47859	6.78951e-05	0.078434	0.00331692	0.00294368	0.000134677	0.282833	1.01618e-05	64.3	0.282829	0.282745	2.99024	0.359396
CP006-23	120	1.47879	6.57446e-05	0.117058	0.0122432	0.00299346	0.000525613	0.282836	1.07744e-05	61.3	0.282832	0.282747	3.03503	0.381058
CP006-24	120	1.47832	7.83973e-05	0.155793	0.00462748	0.00636201	0.000144685	0.283006	1.16412e-05	59.5	0.282999	0.282748	8.88161	0.411705
CP006-25	120	1.47856	6.43512e-05	0.118902	0.00267462	0.00546851	9.9569e-05	0.283013	1.20738e-05	79.4	0.283005	0.282735	9.55001	0.427022
CP006-41	120	1.4786	9.55642e-05	0.0552958	0.00230941	0.00205075	8.36369e-05	0.282543	1.2526e-05	81.4	0.28254	0.282734	-6.85535	0.443027
CP006-45	120	1.47871	7.59086e-05	0.0560673	0.00201535	0.00268329	8.26719e-05	0.282825	1.42196e-05	60.2	0.282822	0.282747	2.65272	0.502902
CP006-51	120	1.47825	0.000131626	0.0676808	0.0015568	0.00253075	6.04924e-05	0.282816	1.23819e-05	58.8	0.282813	0.282748	2.29631	0.43791
CP006-52	120	1.47868	7.35659e-05	0.0783814	0.00308747	0.00311757	9.68866e-05	0.282594	1.05966e-05	82.3	0.282589	0.282733	-5.09994	0.374784
CP006-53	120	1.47875	8.24859e-05	0.0529934	0.00230457	0.00250393	8.02062e-05	0.282824	1.09276e-05	59.3	0.282822	0.282748	2.60865	0.386476
CP006-54	120	1.4785	8.1217e-05	0.0751274	0.00221273	0.00262197	3.39239e-05	0.28215	1.35152e-05	72.2	0.282146	0.28274	-20.9893	0.478003
CP006-59	120	1.47876	6.65455e-05	0.0641569	0.000817356	0.00260409	2.50294e-05	0.28277	1.00116e-05	61.5	0.282767	0.282746	0.746062	0.354081
CP006-60	120	1.47868	8.09722e-05	0.0737716	0.00143605	0.00291427	6.00582e-05	0.282804	9.55397e-06	61.8	0.282801	0.282746	1.92971	0.337895
CP006-61	120	1.47873	7.28597e-05	0.0725709	0.00159538	0.00318756	6.58485e-05	0.282811	1.03165e-05	61.1	0.282808	0.282747	2.15822	0.364862
CP006-64	120	1.47867	7.6446e-05	0.0732276	0.00278453	0.00339536	0.000105488	0.282824	9.16181e-06	60.2	0.28282	0.282747	2.57911	0.324024
CP006-71	120	1.47878	6.83714e-05	0.065892	0.0032215	0.00298207	0.000130189	0.282804	1.08081e-05	61.4	0.282801	0.282746	1.92097	0.38225
CP006-72	120	1.47861	8.81582e-05	0.120278	0.00853743	0.00381428	0.000272316	0.282819	1.15182e-05	61	0.282815	0.282747	2.41428	0.407362
CP006-74	107	1.47887	7.89493e-05	0.0746161	0.00485155	0.00354096	0.000178456	0.282885	1.02223e-05	60.3	0.282881	0.282747	4.74512	0.361528
CP006-75	82	1.47848	0.000573701	0.108504	0.0148089	0.00360477	0.000107771	0.282828	6.92433e-05	59.4	0.282824	0.282748	2.68302	2.44891
CP006-77	113	1.47818	0.000976674	0.0820764	0.00139618	0.00298728	9.9054e-05	0.282809	2.3647e-05	58.9	0.282805	0.282748	2.02968	0.836317
CP006-78	120	1.47842	7.07534e-05	0.0880936	0.00297954	0.00344845	6.9655e-05	0.282832	9.88907e-06	59.2	0.282829	0.282748	2.85496	0.349744
CP006-79	120	1.47847	6.94687e-05	0.0594863	0.00418463	0.00290024	0.000139638	0.282933	1.12998e-05	60.1	0.28293	0.282747	6.47093	0.399637
CP006-80	98	1.47859	0.000389871	0.154241	0.0129022	0.00458627	0.000225974	0.282611	5.62838e-05	71.7	0.282605	0.28274	-4.76193	1.99061
CP006-81	117	1.47837	9.0888e-05	0.0671767	0.00400442	0.00367715	0.00017931	0.283021	1.41238e-05	71.9	0.283016	0.28274	9.75433	0.499526
CP006-82	120	1.47817	7.78628e-05	0.147843	0.00666098	0.00436803	0.000247154	0.282989	1.05795e-05	72.7	0.282983	0.282739	8.62076	0.374172
CP006-90	120	1.47861	7.17779e-05	0.0749178	0.00741485	0.00379772	0.00026171	0.282631	9.61248e-06	72.5	0.282626	0.282739	-4.00972	0.33997
CP006-91	120	1.47847	8.11291e-05	0.0825945	0.00285952	0.00339528	9.16772e-05	0.282807	1.00247e-05	60.6	0.282803	0.282747	1.99019	0.354541
SW Ecuador. Eocene. Punta Ancon Formation
CP011-4	120	1.4783	8.35749e-05	0.0879957	0.00232424	0.00330889	5.13742e-05	0.282814	9.29852e-06	49.5	0.282811	0.282754	2.01565	0.328852
CP011-5	120	1.47825	9.25385e-05	0.0977435	0.00199427	0.00353611	7.51298e-05	0.282669	9.92101e-06	43.5	0.282666	0.282758	-3.22766	0.350863
CP011-7	120	1.4781	8.28416e-05	0.14839	0.0104876	0.00536677	0.000256247	0.283031	9.54135e-06	74.2	0.283023	0.282738	10.0708	0.337453
CP011-9	93	1.47834	0.000120165	0.100091	0.00264851	0.00314881	2.65786e-05	0.282736	9.23923e-06	43.1	0.282734	0.282758	-0.852337	0.326751
CP011-10	105	1.47817	9.71681e-05	0.235179	0.0047478	0.00665762	9.41209e-05	0.282776	1.22079e-05	42.5	0.282771	0.282758	0.445324	0.431733
CP011-12	101	1.47833	9.06443e-05	0.122106	0.00388433	0.00388181	4.03892e-05	0.282684	8.25019e-06	43.3	0.282681	0.282758	-2.72135	0.291773
CP011-13	100	1.47828	0.000175111	0.0651528	0.00197975	0.00177393	8.30637e-05	0.282573	1.54003e-05	72.7	0.28257	0.282739	-5.97899	0.544679
CP011-27	120	1.47816	8.96254e-05	0.166704	0.0066131	0.00444585	0.000202519	0.283039	1.01419e-05	73.4	0.283033	0.282739	10.3943	0.358695
CP011-28	120	1.47807	0.000120443	0.100355	0.00189612	0.0032319	0.00014105	0.282676	1.00659e-05	39.9	0.282674	0.28276	-3.03713	0.355983
CP011-31	103	1.47823	0.00130012	0.171943	0.0117437	0.00513313	0.000403628	0.28273	8.52273e-05	42.1	0.282726	0.282759	-1.14926	3.01409
CP011-36	102	1.47832	0.00100483	0.0864959	0.00492549	0.00230232	0.00017433	0.28269	4.2238e-05	42.1	0.282688	0.282759	-2.50591	1.49377
CP011-39	92	1.47827	0.000713957	0.0781575	0.00532037	0.0023841	0.000153935	0.282689	2.45369e-05	43.5	0.282687	0.282758	-2.51377	0.867765
CP011-41	95	1.47817	0.000520885	0.085726	0.00570332	0.00294879	0.000117324	0.282739	2.34697e-05	42.3	0.282737	0.282758	-0.770366	0.830018
CP011-41bis.	69	1.47844	0.00132259	0.0994676	0.00539666	0.00327947	0.000100952	0.282789	3.93568e-05	42.3	0.282786	0.282758	0.98418	1.39187
CP011-43	120	1.47834	8.78095e-05	0.0982019	0.00724696	0.00399739	0.000223696	0.28279	1.10369e-05	43.1	0.282787	0.282758	1.01592	0.390327
CP011-44	115	1.47822	0.000343487	0.0881613	0.00289352	0.00283731	8.1386e-05	0.282668	2.05921e-05	43.6	0.282666	0.282758	-3.25643	0.728253
CP011-45	120	1.47817	9.7252e-05	0.115538	0.0127661	0.00258711	0.000386926	0.282734	1.09415e-05	43	0.282732	0.282758	-0.935747	0.386953
SW Ecuador. Middle Miocene. Progreso Formation
CP023-1	35	1.47265	0.000357931	0.0803807	0.00996905	0.00270564	0.000415027	0.282722	2.4336e-05	41	0.28272	0.282759	-1.37449	0.860656
CP023-2	88	1.47281	0.000130802	0.0786369	0.00236846	0.00273288	3.30178e-05	0.282865	1.76262e-05	11	0.282865	0.282778	3.05871	0.623322
CP023-3	53	1.47305	0.000170208	0.058629	0.00154205	0.0020648	7.03779e-05	0.282827	2.62118e-05	11	0.282826	0.282778	1.70313	0.926937
CP023-5	31	1.47221	0.000455297	0.033001	0.00104932	0.00113547	0.000105592	0.282432	4.11097e-05	80.3	0.28243	0.282735	-10.7662	1.45399
CP023-6	51	1.47301	0.000370051	0.0579681	0.00673444	0.00195729	0.000267414	0.282513	2.7175e-05	73.1	0.282511	0.282739	-8.08096	0.961124
CP023-7	54	1.47216	0.000179062	0.0775526	0.00475445	0.00250961	8.44834e-05	0.282892	2.44884e-05	11.5	0.282891	0.282778	4.01186	0.865992
CP023-9	120	1.47279	9.67523e-05	0.0422641	0.000626142	0.00149825	1.7243e-05	0.282619	1.72856e-05	71.3	0.282617	0.28274	-4.36237	0.611355
CP023-10	109	1.47282	0.000103288	0.087789	0.00356997	0.00299165	0.000128374	0.28289	1.67635e-05	10.2	0.28289	0.282779	3.92253	0.592811
CP023-11	64	1.4728	0.000227492	0.14744	0.0128523	0.00436888	0.000326276	0.282441	2.66898e-05	74.4	0.282435	0.282738	-10.7186	0.943955
CP023-12	55	1.47264	0.000218014	0.103944	0.00693025	0.00320497	0.000163623	0.282858	2.5237e-05	22.2	0.282857	0.282771	3.03224	0.892485
CP023-13	57	1.47313	0.000649964	0.117609	0.00665674	0.00389335	0.00014226	0.282919	4.33975e-05	22.2	0.282918	0.282771	5.19122	1.53471
CP023-17	49	1.47327	0.000748555	0.0550333	0.00134911	0.00192141	0.000125749	0.282468	4.88871e-05	89.5	0.282464	0.282729	-9.34975	1.7291
CP023-19	45	1.47282	0.000241608	0.233361	0.00899485	0.00640077	0.000444363	0.283026	2.81754e-05	52.6	0.28302	0.282752	9.46807	0.996449
CP023-21	71	1.47287	0.000201056	0.0887182	0.00182844	0.00319504	0.0001157	0.282817	2.46369e-05	10.4	0.282817	0.282778	1.35432	0.871242
CP023-24	72	1.47304	0.000169888	0.0823692	0.00329691	0.00273959	8.36285e-05	0.282892	2.32733e-05	9.8	0.282891	0.282779	3.97516	0.82302
CP023-25	79	1.47297	0.0001509	0.0519763	0.00135868	0.00187881	2.49098e-05	0.282877	1.53853e-05	10.2	0.282877	0.282779	3.4704	0.544076
CP023-26	101	1.47331	9.96948e-05	0.153628	0.00187049	0.00513481	4.56312e-05	0.282987	1.43114e-05	43.2	0.282982	0.282758	7.94098	0.506129
CP023-27	89	1.47325	0.000121245	0.078313	0.000726596	0.00279924	5.03221e-05	0.282823	1.87437e-05	63.7	0.28282	0.282745	2.65686	0.662909
CP023-30	45	1.47279	0.000245183	0.0708301	0.00133599	0.00232624	0.000126834	0.282818	3.10698e-05	12.2	0.282817	0.282777	1.40234	1.09874
CP023-31	65	1.47311	0.000160916	0.0913475	0.0082925	0.00286526	0.000235946	0.282728	2.12523e-05	42.3	0.282726	0.282758	-1.15209	0.7516
CP023-35	84	1.4729	0.000134961	0.0661071	0.00103163	0.00239668	3.77733e-05	0.282894	1.98365e-05	13	0.282893	0.282777	4.10592	0.701488
CP023-36	50	1.47271	0.000178806	0.145114	0.00988391	0.00481086	0.000248505	0.282924	2.92302e-05	10.5	0.282923	0.282778	5.1069	1.03368
CP023-38	34	1.47349	0.00117917	0.124095	0.00574127	0.00388984	0.000268457	0.282956	6.67637e-05	67.6	0.282951	0.282743	7.38164	2.36125
CP023-40	97	1.47268	0.000129295	0.160117	0.00844845	0.00536984	0.000194796	0.282853	2.0161e-05	18.8	0.282851	0.282773	2.75188	0.712969
CP023-42	62	1.47292	0.00114227	0.112491	0.00438087	0.0034786	0.000156159	0.282775	4.84858e-05	32.8	0.282773	0.282764	0.291782	1.71469
CP023-43	46	1.47454	0.00105537	0.208173	0.0183424	0.0060119	0.000293528	0.283002	4.81377e-05	48.6	0.282997	0.282754	8.56404	1.70242
CP023-45	75	1.47354	0.000146878	0.148643	0.0170347	0.00440455	0.000386855	0.282706	1.89465e-05	30.1	0.282704	0.282766	-2.1964	0.670035
CP023-46	77	1.47376	0.000123882	0.128461	0.00283205	0.00389855	0.000104626	0.282777	1.58183e-05	27.5	0.282775	0.282768	0.255956	0.559404
CP023-49	84	1.47366	0.000114615	0.166593	0.00967068	0.0051877	0.000232214	0.282534	1.77075e-05	45.9	0.282529	0.282756	-8.03176	0.626236
CP023-52	101	1.47368	0.000100832	0.0538161	0.00297917	0.0018337	9.08494e-05	0.282713	1.69608e-05	32.6	0.282712	0.282765	-1.86275	0.599816
CP023-53	80	1.47338	0.000250982	0.131872	0.0191418	0.00430684	0.000436657	0.282809	2.32429e-05	22	0.282807	0.282771	1.27037	0.821963
CP023-54	74	1.47341	0.000160046	0.152617	0.00483025	0.0044849	0.000150937	0.282784	1.50333e-05	41.2	0.282781	0.282759	0.768451	0.531659
CP023-55	100	1.47337	0.000112844	0.251751	0.0057829	0.00651747	0.000206916	0.282995	1.50882e-05	50	0.282989	0.282754	8.31469	0.533605
CP023-56	77	1.47335	0.00012847	0.0661531	0.00202437	0.00210733	3.21228e-05	0.282767	1.8024e-05	27.5	0.282766	0.282768	-0.0561875	0.637412
CP023-57	84	1.47353	0.000131076	0.0833679	0.00200444	0.00275483	4.93178e-05	0.282881	2.05892e-05	10.7	0.282881	0.282778	3.6277	0.728104
CP023-58	65	1.473	0.000957701	0.15911	0.0254862	0.00478969	0.000587944	0.282981	4.79175e-05	95.1	0.282973	0.282725	8.75379	1.69479
CP023-58bis	54	1.47343	0.000197761	0.149075	0.0178942	0.004567	0.000423413	0.282982	2.00664e-05	95.1	0.282974	0.282725	8.80323	0.709728
CP023-60	46	1.4733	0.000276506	0.140269	0.00467284	0.004637	0.000127274	0.282797	2.50222e-05	24	0.282794	0.28277	0.867185	0.884891
CP023-63	69	1.47342	0.000212326	0.0503229	0.00102025	0.00165665	6.50814e-05	0.282792	2.20037e-05	11.6	0.282792	0.282778	0.50075	0.778125
CP023-66	69	1.4734	0.000164197	0.225007	0.00356512	0.00618293	0.00017195	0.282831	2.16329e-05	20.5	0.282828	0.282772	1.98829	0.765023
CP023-68	65	1.47336	0.000174326	0.0958006	0.0045799	0.00355446	0.000169786	0.282954	2.93735e-05	85.8	0.282948	0.282731	7.67027	1.0389
CP023-79	39	1.47347	0.000286308	0.10551	0.00525401	0.00334332	8.15384e-05	0.28289	3.29764e-05	49.4	0.282887	0.282754	4.69499	1.16624
CP023-83	82	1.47344	0.000139907	0.133712	0.00482378	0.0039441	0.00014512	0.282454	1.65352e-05	72.1	0.282449	0.28274	-10.2989	0.584809
CP023-84	53	1.47312	0.000159788	0.0883341	0.0028056	0.00324402	0.000151734	0.282897	2.70626e-05	11.8	0.282896	0.282778	4.19634	0.957024

## Sheet: Table S3B
Standards run during the session
Analysis	# Cycles integrated	178Hf/177Hf	2σ	174Hf/177Hf	2σ	176Lu/177Hf	2σ	176Hf/177Hf	2σ	Offset
\MUN_4_ 18_01.da	120	1.47601	7.76331e-05	0.28953	0.00679687	0.00922893	0.000109402	0.282097	8.67223e-06	-3.76954e-05
\MUN_4_ 18_02.da	120	1.47609	6.69154e-05	0.32519	0.00953393	0.010128	0.000139415	0.2821	9.96219e-06	-3.45367e-05
\MUN_4_ 18_03.d	120	1.47859	7.3171e-05	0.28177	0.0126919	0.00981786	0.000214426	0.282115	9.54418e-06	-1.99457e-05
\MUN_4_ 18_04.d	120	1.47849	6.44617e-05	0.595894	0.00622947	0.0124465	0.000182619	0.282102	1.22415e-05	-3.31363e-05
\MUN_4_ 18_05.dat	120	1.47825	7.44415e-05	0.425549	0.0086065	0.0110656	6.67714e-05	0.282062	1.11775e-05	-7.32779e-05
\MUN_4_ 18_06.dat	120	1.47851	6.47818e-05	0.547344	0.0031494	0.0126096	0.000104598	0.282054	1.12421e-05	-8.09184e-05
\MUN_4_ 18_01.dat	120	1.4715	0.000104041	0.370305	0.00198421	0.00947767	0.000104563	0.282071	1.57149e-05	-6.39901e-05
\MUN_4_ 18_03.dat	120	1.47224	8.09597e-05	0.365423	0.0029364	0.00922438	6.28703e-05	0.282027	1.25582e-05	-0.000108243
\MUN_4_ 18_04.dat	120	1.4727	8.77532e-05	0.314889	0.00747356	0.00754101	0.000197025	0.282027	1.14439e-05	-0.000108005
\MUN_4_ 18_05.dat	120	1.47274	8.65333e-05	0.316029	0.0075867	0.00781195	0.000197661	0.282037	1.29271e-05	-9.84184e-05
\MUN_4_Zr#3_ 18_01	120	1.46999	0.000105697	0.714193	0.0051259	0.0137941	6.06448e-05	0.281981	3.05123e-05	-0.000153763
\MUN_4_Zr#3_ 18_02	120	1.47038	0.00010378	0.588212	0.00551843	0.011741	2.32268e-05	0.282011	2.25495e-05	-0.000124094
4\MUN_4_ 18_02.dat	120	1.47204	9.78898e-05	0.398258	0.00664942	0.0107627	8.10885e-05	0.282002	1.65523e-05	-0.000132712
4\MUN_4_ 18_06.dat	120	1.47316	9.26133e-05	0.319718	0.00968651	0.00891349	8.21594e-05	0.282021	1.25548e-05	-0.000114265
4\MUN_4_ 18_07.dat	120	1.47346	8.70637e-05	0.365123	0.00506952	0.00901647	7.46498e-05	0.282031	1.17809e-05	-0.000104447
4\MUN_4_ 18_08.dat	120	1.47374	8.16888e-05	0.393534	0.00466791	0.00936117	9.60152e-05	0.282024	1.15997e-05	-0.000111068
GJ1_1_Hf1_ 18_01.d	120	1.47251	0.000107183	0.0353293	0.00011378	0.00111749	1.61334e-06	0.281984	1.6916e-05	-1.63769e-05
GJ1_1_Hf1_ 18_02.d	120	1.47201	9.94122e-05	0.0352341	0.000103286	0.00112782	1.02555e-06	0.281985	1.4757e-05	-1.48472e-05
GJ1_1_Hf1_ 18_03.d	120	1.47264	0.000105616	0.0355215	0.000114623	0.00112838	1.28233e-06	0.281972	1.52679e-05	-2.75612e-05
GJ1_1_Hf1_ 18_04.da	120	1.47313	0.00010161	0.0344362	0.000215076	0.00104518	2.19671e-06	0.281958	1.58069e-05	-4.24923e-05
GJ1_1_Hf1_ 18_05.da	120	1.47365	9.65402e-05	0.0364403	0.000238608	0.00110414	2.42848e-06	0.281956	1.61383e-05	-4.40816e-05
GJ1_1_Hf1_ 18_06.da	120	1.4739	7.48202e-05	0.0363372	0.00023332	0.00109225	2.03934e-06	0.281955	1.19322e-05	-4.54556e-05
GJ1_1_Hf1_ 18_07.da	120	1.47428	7.74944e-05	0.0355227	0.000218661	0.00105741	2.10881e-06	0.281957	1.28967e-05	-4.25049e-05
GJ1b_Zr4_ 18_01	120	1.47136	8.57762e-05	0.0333274	7.32134e-05	0.00113696	1.31671e-06	0.281986	1.31867e-05	-1.38185e-05
GJ1b_Zr4_ 18_02	120	1.47158	0.000135993	0.0343227	6.14103e-05	0.00115711	1.03061e-06	0.281972	1.68509e-05	-2.79139e-05
GJ1b_Zr4_ 18_03	120	1.4715	0.00010685	0.0349237	8.32533e-05	0.00116504	3.01719e-06	0.281979	1.63684e-05	-2.1163e-05
GJ1b_Zr4_ 18_04	120	1.47653	7.99988e-05	0.0360892	8.97256e-05	0.00116632	2.4492e-06	0.281998	1.23631e-05	-2.3799e-06
GJ1b_Zr4_ 18_05	120	1.47646	7.07871e-05	0.0360778	2.94941e-05	0.00117081	9.13976e-07	0.281988	1.13187e-05	-1.1736e-05
GJ1b_Zr4_ 18_06	120	1.47818	7.1201e-05	0.0403125	0.00166348	0.00125621	1.32484e-05	0.281993	9.80109e-06	-7.24633e-06
GJ1b_Zr4_ 18_07	120	1.47901	8.14692e-05	0.0352581	0.000348426	0.00112229	2.53435e-06	0.281982	1.22407e-05	-1.80082e-05
GJ1b_Zr4_ 18_08	120	1.47916	7.2494e-05	0.0352923	0.000106854	0.001184	1.77675e-06	0.281998	1.17253e-05	-1.81204e-06
GJ1b_Zr4_ 18_09	120	1.47897	7.683e-05	0.0362867	0.000350367	0.00119245	2.41532e-06	0.281991	1.12994e-05	-9.19091e-06
GJ1b_Zr4_ 18_10.da	120	1.47886	6.49891e-05	0.0351485	0.000284612	0.00112984	3.11214e-06	0.281976	1.11855e-05	-2.41402e-05
GJ1b_Zr4_ 18_10vra	120	1.4787	6.39608e-05	0.0356668	0.000446921	0.00116021	2.9252e-06	0.281974	1.26657e-05	-2.64165e-05
GJ1b_Zr4_ 18_11.da	120	1.47892	5.9206e-05	0.0402752	0.00102732	0.00132267	1.14181e-05	0.281972	1.07362e-05	-2.84825e-05
TANK\MT4_22mar18_01.da	120	2.95672	0.0960002	-0.632443	0.0363467	0.100488	0.00565618	0.0737831	0.0138348	-0.208724
TANK\MT4_22mar18_01a.d	120	2.64232	0.129286	-0.553613	0.0490176	0.0735739	0.00826817	0.118677	0.0187095	-0.16383
TANK\MT4_22mar18_01b.d	120	1.4741	8.54234e-05	0.0105108	2.74799e-05	8.07719e-05	8.11032e-07	0.28248	9.30944e-06	-2.70648e-05
TANK\MT4_ 18_01.da	120	1.48292	6.27631e-05	0.0109206	2.75711e-05	6.98584e-05	8.71317e-07	0.28242	8.15258e-06	-8.69228e-05
TANK\MT4_ 18_02.da	120	1.48214	5.33862e-05	0.0110176	2.92862e-05	7.54162e-05	6.71824e-07	0.282442	8.12101e-06	-6.52674e-05
TANK\MT4_ 18_03.da	120	1.47615	6.46176e-05	0.0111843	7.00919e-05	7.79412e-05	1.28864e-06	0.28246	8.53601e-06	-4.72212e-05
TANK\MT4_ 18_04.da	120	1.47778	6.47694e-05	0.0111266	2.15141e-05	7.89014e-05	7.01083e-07	0.282435	8.14915e-06	-7.20483e-05
TANK\MT4_ 18_05.da	120	1.47527	8.2454e-05	0.010958	2.19778e-05	7.51696e-05	3.17465e-07	0.282468	1.0009e-05	-3.86771e-05
TANK\MT4_ 18_06.da	120	1.47534	7.4226e-05	0.0108396	3.92566e-05	6.73807e-05	1.30252e-06	0.282473	1.12708e-05	-3.42712e-05
TANK\MT4_ 18_07.da	120	1.47706	7.20376e-05	0.0111496	2.68827e-05	7.71035e-05	4.26394e-07	0.282465	9.58875e-06	-4.15606e-05
TANK\MT4_ 18_08.da	120	1.47777	7.63468e-05	0.0111674	3.69687e-05	7.78128e-05	5.83588e-07	0.282441	1.34576e-05	-6.61375e-05
TANK\MT4_ 18_09.da	120	1.47479	8.27098e-05	0.0108027	1.17152e-05	6.85155e-05	5.87269e-07	0.282479	9.72439e-06	-2.83248e-05
TANK\MT4_ 18_10.da	120	1.47377	7.889e-05	0.0108279	2.29355e-05	7.09266e-05	4.90819e-07	0.282487	1.06652e-05	-2.03244e-05
TANK\MT4_ 18_11.da	120	1.47459	5.68051e-05	0.0109837	3.12392e-05	7.12707e-05	1.17472e-06	0.282494	1.03556e-05	-1.25086e-05
TANK\MT4_ 18_12.da	120	1.47612	0.000115515	0.0109951	3.0268e-05	7.08301e-05	9.44569e-07	0.282469	2.07524e-05	-3.76073e-05
TANK\MT4_ 18_13.da	120	1.47506	7.91304e-05	0.0111165	2.41135e-05	7.71447e-05	7.85109e-07	0.282478	1.04057e-05	-2.86117e-05
TANK\MT4_ 18_14.da	120	1.47254	7.95386e-05	0.0107929	3.65264e-05	7.3661e-05	6.92053e-07	0.282474	1.13261e-05	-3.25228e-05
TANK\MT4_ 18_15.da	120	1.47168	8.6525e-05	0.0107681	4.28556e-05	7.46003e-05	7.36623e-07	0.2825	1.35495e-05	-7.46641e-06
TANK\MT4_ 18_16.dat	120	1.47221	8.45212e-05	0.0108733	2.46244e-05	7.50026e-05	4.93065e-07	0.282481	1.45895e-05	-2.58824e-05
TANK\MT4_ 18_17.dat	120	1.47229	8.87426e-05	0.0108637	2.07781e-05	7.40223e-05	9.61529e-07	0.282467	1.40474e-05	-4.0467e-05
TANK\MT4_ 18_18.dat	120	1.47332	8.91474e-05	0.0106295	1.26858e-05	6.50492e-05	6.93592e-07	0.282467	1.33588e-05	-3.97849e-05
TANK\MT4_ 18_19.dat	120	1.4743	8.28544e-05	0.0104752	1.19491e-05	6.0947e-05	4.19593e-07	0.282466	1.25996e-05	-4.11081e-05
TANK\MT4_ 18_20.dat	120	1.47428	9.39409e-05	0.0104563	2.69319e-05	6.61502e-05	6.77864e-07	0.282475	1.37374e-05	-3.15987e-05
TANK\MT4_ 18_21.dat	120	1.47302	9.12433e-05	0.010579	2.543e-05	7.16948e-05	8.78256e-07	0.282454	1.28139e-05	-5.27195e-05
TANK\MT4_ 18_22.dat	120	1.47372	0.000105434	0.0106888	1.88026e-05	7.14135e-05	8.80816e-07	0.282473	1.33649e-05	-3.41896e-05
TANK\MT4_ 18_23.dat	120	1.47404	0.000110342	0.0105207	2.81216e-05	6.04092e-05	1.33913e-06	0.282471	1.26157e-05	-3.55918e-05
ANK\MT4_ 18_01.dat	120	1.47871	9.49156e-05	0.0104127	1.905e-05	6.69766e-05	5.72061e-07	0.282487	1.27674e-05	-2.03196e-05
ANK\MT4_ 18_02.dat	120	1.47168	0.000111761	0.0105419	1.33439e-05	6.99234e-05	6.67442e-07	0.282481	1.5021e-05	-2.64236e-05
ANK\MT4_ 18_03.dat	120	1.46749	0.000122312	0.0105438	1.64316e-05	6.65696e-05	7.79012e-07	0.282471	1.55359e-05	-3.61922e-05
ANK\MT4_ 18_04.dat	120	1.4765	0.000130386	0.0105511	1.52326e-05	6.57614e-05	5.86458e-07	0.282483	1.50514e-05	-2.35041e-05
ANK\MT4_ 18_05.dat	120	1.4691	0.000118483	0.0104522	4.11734e-05	6.88167e-05	6.86386e-07	0.282475	1.68741e-05	-3.23576e-05
ANK\MT4_ 18_06.dat	120	1.47145	8.6371e-05	0.0106799	1.55212e-05	7.64211e-05	9.92983e-07	0.282482	1.28879e-05	-2.48557e-05
ANK\MT4_ 18_07.dat	120	1.46809	0.000150705	0.0106358	1.84883e-05	7.19637e-05	1.25497e-06	0.282476	1.97712e-05	-3.09432e-05
ANK\MT4_ 18_08.dat	120	1.47337	0.000105819	0.0107354	2.5707e-05	7.81029e-05	7.68102e-07	0.282478	1.35105e-05	-2.89158e-05
ANK\MT4_ 18_09.dat	120	1.46114	0.000108637	0.0104699	2.0981e-05	6.66565e-05	4.12339e-07	0.282478	1.44099e-05	-2.9429e-05
ANK\MT4_ 18_10.dat	120	1.46896	0.000106692	0.010512	1.53219e-05	6.76082e-05	8.2392e-07	0.282476	1.05625e-05	-3.07566e-05
ANK\MT4_ 18_11.dat	120	1.47166	0.000126958	0.0105805	1.67858e-05	7.53396e-05	5.88221e-07	0.282485	1.75761e-05	-2.23013e-05
ANK\MT4_ 18_12.dat	120	1.46716	9.79667e-05	0.0107548	2.9684e-05	7.34273e-05	1.33371e-06	0.282461	1.42163e-05	-4.5673e-05
ANK\MT4_ 18_13.dat	120	1.4792	7.24981e-05	0.0103227	1.36146e-05	6.60353e-05	4.93344e-07	0.282477	8.80731e-06	-3.0442e-05
ANK\MT4_ 18_14.dat	120	1.47922	8.52441e-05	0.0104435	1.6036e-05	7.00912e-05	8.7166e-07	0.28248	9.98201e-06	-2.66917e-05
ANK\MT4_ 18_15.dat	120	1.47901	6.7386e-05	0.0206461	0.000202589	0.000391229	3.97309e-06	0.282434	7.62438e-06	-7.32536e-05
ANK\MT4_ 18_16.dat	120	1.47913	6.30515e-05	0.0208922	0.000143979	0.000399445	2.44083e-06	0.282425	9.23926e-06	-8.2165e-05
TANK\MT4_ 18_24.dat	120	1.47425	8.39741e-05	0.0107772	2.52881e-05	7.38328e-05	5.96619e-07	0.282466	1.1491e-05	-4.09399e-05
VICE\Pleso2_ 18_01	120	1.4765	0.000115413	0.0228665	2.53938e-05	0.000395394	2.52799e-06	0.282447	1.55026e-05	-3.45762e-05
VICE\Pleso2_ 18_02	120	1.46887	0.000112604	0.0217829	8.71245e-05	0.000397886	2.98181e-06	0.282444	1.43065e-05	-3.8299e-05
VICE\Pleso2_ 18_03	120	1.47157	0.000122722	0.0220319	4.85695e-05	0.000426349	1.45975e-06	0.282438	1.26828e-05	-4.39681e-05
VICE\Pleso2_ 18_04	120	1.4791	7.10206e-05	0.0221466	4.23093e-05	0.000409498	3.05674e-06	0.282446	9.18387e-06	-3.59248e-05
VICE\Pleso2_ 18_05	120	1.47908	7.97135e-05	0.0214238	0.000127092	0.000407711	2.44061e-06	0.282444	7.43633e-06	-3.77121e-05
VICE\Pleso2_ 18_01	120	1.47235	0.000168052	0.0210651	6.35513e-05	0.00031109	6.46189e-07	0.282449	1.35245e-05	-3.25444e-05
VICE\Pleso2_ 18_02	120	1.47846	0.000120242	0.0211399	0.000196731	0.000325382	1.61977e-06	0.28241	1.50426e-05	-7.23653e-05
VICE\Pleso2_ 18_03	120	1.47349	0.000118911	0.0235817	0.000138693	0.000401144	1.81077e-06	0.282444	1.34555e-05	-3.81535e-05
VICE\Pleso2_ 18_04	120	1.47199	0.000115591	0.0233759	0.000126152	0.000408657	1.08905e-06	0.282458	1.44065e-05	-2.36745e-05
VICE\Pleso2_ 18_05	120	1.47065	0.000100307	0.0231535	0.000150262	0.000422205	1.5884e-06	0.282439	1.24822e-05	-4.26634e-05
VICE\Pleso2_ 18_06	120	1.4724	0.000111165	0.0243085	0.000188746	0.000446401	9.63842e-07	0.282456	1.36769e-05	-2.58034e-05
VICE\Pleso2_ 18_07	120	1.47435	0.00011114	0.0258752	0.000200605	0.000478596	1.28574e-06	0.282423	1.43442e-05	-5.87847e-05
VICE\Pleso2_ 18_08	120	1.4707	0.000143225	0.0234162	0.000187922	0.000418085	2.85997e-06	0.282439	1.41707e-05	-4.2537e-05
VICE\Pleso2_ 18_09	120	1.4726	0.000108581	0.0266849	0.000146584	0.000501131	2.00885e-06	0.282439	1.50368e-05	-4.28559e-05
VICE\Pleso2_ 18_10.	120	1.47287	0.000134698	0.0226909	0.000295259	0.000373574	2.28762e-06	0.282434	1.58287e-05	-4.82612e-05

## Sheet: Table S3C
Neogene intrusions. Schutte (2009)
Intrusion	143Nd/144Nd	eNd	Age	eHf	eHf = 1.36 eNd+2.95
Apuela (Junin)	0.51298	6.7	15	12.062
Apuela (Cuellaje)	0.51295	6	13	11.11
Apuela (Cuellaje)	0.51296	6.3	13	11.518
Junin	0.51297	6.4	9	11.654
Junin	0.51295	6.1	9	11.246
Junin	0.51296	6.3	9	11.518
Balsapamba	0.51293	5.6	22	10.566
Balsapamba	0.51297	6.5	22	11.79
Balsapamba	0.51296	6.3	21	11.518
Balsapamba	0.51297	6.5	21	11.79
Balsapamba	0.51294	6	21	11.11
Balsapamba	0.51294	6	21	11.11
Telimbela	0.51297	6.5	26	11.79
Telimbela	0.51299	6.8	21	12.198
Telimbela	0.51297	6.5	16	11.79
Gaby	0.5129	5.1	20	9.886
Gaby	0.51289	5	20	9.75
Gaby	0.51292	5.5	20	10.43
Gaby	0.51286	4.4	20	8.934
Gaby/Papa Grande	0.51288	4.7	20	9.342
Gaby	0.51287	4.5	20	9.07
Gaby	0.51289	5	20	9.75
Chaucha: Naranjos	0.5127	1.2	10	4.582
Chaucha: Tunas	0.51269	1	10	4.31
Chaucha: Naranjos	0.51275	2.2	15	5.942
Chaucha: Tunas	0.51276	2.4	15	6.214
Chaucha: Tunas	0.51274	2	15	5.67
Cangrejos	0.51253	-2.2	26	-0.042
Cangrejos	0.51265	0.2	26	3.222
Cangrejos	0.51255	-1.7	23	0.638
Cangrejos	0.51253	-2.1	23	0.094
Portovelo	0.51261	-0.6	24	2.134
Portovelo	0.51263	-0.3	24	2.542
Portovelo	0.51266	0.4	21	3.494
Portovelo	0.51271	1.4	21	4.854
Zaruma	0.51269	1.1	21	4.446
El Mozo	0.51267	0.6	16	3.766
El Mozo	0.51266	0.4	16	3.494
El Mozo	0.51269	1	16	4.31

## Sheet: Table S4
			d18O 91500	10.2
Analysis Name	d18O	2s	d18O corr	2s
Std91500-1	#ERROR!	#ERROR!
Std91500-02	#ERROR!	#ERROR!
Std91500-03	#ERROR!	#ERROR!
Std91500-04	#ERROR!	#ERROR!
Std91500-05	#ERROR!	#ERROR!
Std91500-06	#ERROR!	#ERROR!
Std91500-07	#ERROR!	#ERROR!
Std91500-08	#ERROR!	#ERROR!
Std91500-09	#ERROR!	#ERROR!
Std91500-10	#ERROR!	#ERROR!
Std91500-11	#ERROR!	#ERROR!
Std91500-12	#ERROR!	#ERROR!
Std91500-13	#ERROR!	#ERROR!
Std91500-14	#ERROR!	#ERROR!
Std91500-15	#ERROR!	#ERROR!	#ERROR!	#ERROR!	IMF	#ERROR!
CP212-2	#ERROR!	#ERROR!	#ERROR!	#ERROR!
CP212-3	#ERROR!	#ERROR!	#ERROR!	#ERROR!
CP212-4	#ERROR!	#ERROR!	#ERROR!	#ERROR!
CP212-5	#ERROR!	#ERROR!	#ERROR!	#ERROR!
CP212-6	#ERROR!	#ERROR!	#ERROR!	#ERROR!
CP212-7	#ERROR!	#ERROR!	#ERROR!	#ERROR!
CP212-8	#ERROR!	#ERROR!	#ERROR!	#ERROR!
CP212-9	#ERROR!	#ERROR!	#ERROR!	#ERROR!
CP212D-1	#ERROR!	#ERROR!	#ERROR!	#ERROR!
CP212D-2	#ERROR!	#ERROR!	#ERROR!	#ERROR!
CP212D-3	#ERROR!	#ERROR!	#ERROR!	#ERROR!
CP212D-4	#ERROR!	#ERROR!	#ERROR!	#ERROR!
CP212D-5	#ERROR!	#ERROR!	#ERROR!	#ERROR!
CP212D-6	#ERROR!	#ERROR!	#ERROR!	#ERROR!
CP212D-7	#ERROR!	#ERROR!	#ERROR!	#ERROR!
CP212D-8	#ERROR!	#ERROR!	#ERROR!	#ERROR!
CP212D-9	#ERROR!	#ERROR!	#ERROR!	#ERROR!
CP006G-1	#ERROR!	#ERROR!	#ERROR!	#ERROR!
CP006G-2	#ERROR!	#ERROR!	#ERROR!	#ERROR!
CP006G-3	#ERROR!	#ERROR!	#ERROR!	#ERROR!
Std91500-16	#ERROR!	#ERROR!
Std91500-17	#ERROR!	#ERROR!
Std91500-18	#ERROR!	#ERROR!
Std91500-19	#ERROR!	#ERROR!
Std91500-20	#ERROR!	#ERROR!
Std91500-21	#ERROR!	#ERROR!
Std91500-22	#ERROR!	#ERROR!
Std91500-23	#ERROR!	#ERROR!
Std91500-24	#ERROR!	#ERROR!
Std91500-25	#ERROR!	#ERROR!	#ERROR!	#ERROR!	IMF	#ERROR!
CP006-23	#ERROR!	#ERROR!	#ERROR!	#ERROR!
CP006-72	#ERROR!	#ERROR!	#ERROR!	#ERROR!
CP006-71	#ERROR!	#ERROR!	#ERROR!	#ERROR!
CP006-91	#ERROR!	#ERROR!	#ERROR!	#ERROR!
CP006-89	#ERROR!	#ERROR!	#ERROR!	#ERROR!
CP006-79	#ERROR!	#ERROR!	#ERROR!	#ERROR!
CP006-78	#ERROR!	#ERROR!	#ERROR!	#ERROR!
CP006-80	#ERROR!	#ERROR!	#ERROR!	#ERROR!
CP006-77	#ERROR!	#ERROR!	#ERROR!	#ERROR!
CP006-77	#ERROR!	#ERROR!	#ERROR!	#ERROR!
CP006-68	#ERROR!	#ERROR!	#ERROR!	#ERROR!
CP006-67	#ERROR!	#ERROR!	#ERROR!	#ERROR!
CP006-69	#ERROR!	#ERROR!	#ERROR!	#ERROR!
CP006-53	#ERROR!	#ERROR!	#ERROR!	#ERROR!
CP006-52	#ERROR!	#ERROR!	#ERROR!	#ERROR!
CP011G-41	#ERROR!	#ERROR!	#ERROR!	#ERROR!
CP011G-39	#ERROR!	#ERROR!	#ERROR!	#ERROR!
CP011G-40	#ERROR!	#ERROR!	#ERROR!	#ERROR!
CP011G-38	#ERROR!	#ERROR!	#ERROR!	#ERROR!
CP011G-36	#ERROR!	#ERROR!	#ERROR!	#ERROR!
CP011G-42	#ERROR!	#ERROR!	#ERROR!	#ERROR!
CP011G-43	#ERROR!	#ERROR!	#ERROR!	#ERROR!
CP011G-44	#ERROR!	#ERROR!	#ERROR!	#ERROR!
CP011G-44	#ERROR!	#ERROR!	#ERROR!	#ERROR!
CP011G-45	#ERROR!	#ERROR!	#ERROR!	#ERROR!
CP011G-46	#ERROR!	#ERROR!	#ERROR!	#ERROR!
CP011G-48	#ERROR!	#ERROR!	#ERROR!	#ERROR!
CP011G-28	#ERROR!	#ERROR!	#ERROR!	#ERROR!
CP011G-29	#ERROR!	#ERROR!	#ERROR!	#ERROR!
CP011G-29	#ERROR!	#ERROR!	#ERROR!	#ERROR!
CP011G-30	#ERROR!	#ERROR!	#ERROR!	#ERROR!
CP011G-30b	#ERROR!	#ERROR!	#ERROR!	#ERROR!
CP011G-19	#ERROR!	#ERROR!	#ERROR!	#ERROR!
CP011G-12	#ERROR!	#ERROR!	#ERROR!	#ERROR!
CP011G-9	#ERROR!	#ERROR!	#ERROR!	#ERROR!
Std91500-28	#ERROR!	#ERROR!
Std91500-29	#ERROR!	#ERROR!
Std91500-30	#ERROR!	#ERROR!	#ERROR!	#ERROR!	IMF	#ERROR!
CP005-18	#ERROR!	#ERROR!	#ERROR!	#ERROR!
CP005-14	#ERROR!	#ERROR!	#ERROR!	#ERROR!
CP005-17	#ERROR!	#ERROR!	#ERROR!	#ERROR!
CP005-15	#ERROR!	#ERROR!	#ERROR!	#ERROR!
CP005-12	#ERROR!	#ERROR!	#ERROR!	#ERROR!
CP005-5	#ERROR!	#ERROR!	#ERROR!	#ERROR!
CP005-1	#ERROR!	#ERROR!	#ERROR!	#ERROR!
CP005-30	#ERROR!	#ERROR!	#ERROR!	#ERROR!
CP005-35	#ERROR!	#ERROR!	#ERROR!	#ERROR!
CP005-37	#ERROR!	#ERROR!	#ERROR!	#ERROR!
CP005-22	#ERROR!	#ERROR!	#ERROR!	#ERROR!
CP005-23	#ERROR!	#ERROR!	#ERROR!	#ERROR!
CP005-24	#ERROR!	#ERROR!	#ERROR!	#ERROR!
CP005-51	#ERROR!	#ERROR!	#ERROR!	#ERROR!
CP005-52	#ERROR!	#ERROR!	#ERROR!	#ERROR!
CP005-53	#ERROR!	#ERROR!	#ERROR!	#ERROR!
CP005-80	#ERROR!	#ERROR!	#ERROR!	#ERROR!
CP-405-32	#ERROR!	#ERROR!	#ERROR!	#ERROR!
CP-405--31	#ERROR!	#ERROR!	#ERROR!	#ERROR!
CP-405-18	#ERROR!	#ERROR!	#ERROR!	#ERROR!
CP-405-16	#ERROR!	#ERROR!	#ERROR!	#ERROR!
CP-405-17	#ERROR!	#ERROR!	#ERROR!	#ERROR!
CP-405-4	#ERROR!	#ERROR!	#ERROR!	#ERROR!
CP-405-5	#ERROR!	#ERROR!	#ERROR!	#ERROR!
CP-405-6	#ERROR!	#ERROR!	#ERROR!	#ERROR!
CP-405-7	#ERROR!	#ERROR!	#ERROR!	#ERROR!
CP-405-19	#ERROR!	#ERROR!	#ERROR!	#ERROR!
CP-405-20	#ERROR!	#ERROR!	#ERROR!	#ERROR!
CP-405-9	#ERROR!	#ERROR!	#ERROR!	#ERROR!
CP405-13	#ERROR!	#ERROR!	#ERROR!	#ERROR!
CP405-14	#ERROR!	#ERROR!	#ERROR!	#ERROR!
CP-405-25	#ERROR!	#ERROR!	#ERROR!	#ERROR!
CP-405-24	#ERROR!	#ERROR!	#ERROR!	#ERROR!
CP-405-35	#ERROR!	#ERROR!	#ERROR!	#ERROR!
CP-405-38	#ERROR!	#ERROR!	#ERROR!	#ERROR!
Std91500-32	#ERROR!	#ERROR!
Std91500-33	#ERROR!	#ERROR!
Std91500-34	#ERROR!	#ERROR!
Std91500-35	#ERROR!	#ERROR!
Std91500-36	#ERROR!	#ERROR!
Std91500-37	#ERROR!	#ERROR!	#ERROR!	#ERROR!	IMF	#ERROR!
CP006-82	#ERROR!	#ERROR!	#ERROR!	#ERROR!
CP006-81	#ERROR!	#ERROR!	#ERROR!	#ERROR!
CP006-90	#ERROR!	#ERROR!	#ERROR!	#ERROR!
CP006-25	#ERROR!	#ERROR!	#ERROR!	#ERROR!
CP006-22	#ERROR!	#ERROR!	#ERROR!	#ERROR!

## Sheet: Table S5A
Grain	Age	2S		Si29_CPS	Si29_CPS2s	Ti (ppm)m49	Ti (ppm)m492s	Sr (ppm)m88	Sr (ppm)m882s	Y (ppm)m89	Y (ppm)m892s	Nb (ppm)m93	Nb (ppm)m932s	La (ppm)m139	La (ppm)m1392s	Ce (ppm)m140	Ce (ppm)m1402s	Pr (ppm)m141	Pr (ppm)m1412s	Nd (ppm)m146	Nd (ppm)m1462s	Sm (ppm)m147	Sm (ppm)m1472s	Eu (ppm)m153	Eu (ppm)m1532s	Gd (ppm)m157	Gd (ppm)m1572s	Tb (ppm)m159	Tb (ppm)m1592s	Dy (ppm)m163	Dy (ppm)m1632s	Ho (ppm)m165	Ho (ppm)m1652s	Er (ppm)m166	Er (ppm)m1662s	Tm (ppm)m169	Tm (ppm)m1692s	Yb (ppm)m172	Yb (ppm)m1722s	Lu (ppm)m175	Lu (ppm)m1752s	Hf (ppm)m178	Hf (ppm)m1782s	Ta (ppm)m181	Ta (ppm)m1812s	Th (ppm)m232	Th (ppm)m2322s	U (ppm)m238	U (ppm)m2382s
CP006-21	60.5	0.76		785000	34000	4.43	0.97	0.277	0.047	739	29	3.94	0.21	0.0268	0.0082	33.1	1.4	0.0434	0.0098	0.75	0.11	1.83	0.16	0.791	0.058	11.57	0.55	4	0.17	56	2.3	22.38	0.86	117.8	4.8	28.8	1.1	294	12	64.5	2.6	11780	460	1.713	0.082	402	17	670	27
CP006-22	64.3	0.83		802000	34000	5.14	0.92	0.279	0.048	684	32	1.18	0.085	0.0148	0.0061	11.25	0.57	0.052	0.01	1.05	0.13	2.35	0.2	0.845	0.067	12.59	0.7	4.26	0.21	55.1	2.6	21.3	1	108.7	5.2	25	1.2	247	12	54.4	2.5	11400	410	0.394	0.029	102.3	5.9	209	11
CP006-23	61.3	0.76		849000	34000	6.8	1.1	1.44	0.16	1287	51	6.07	0.3	2.45	0.32	59.4	2.4	0.611	0.069	3.77	0.36	3.71	0.26	1.537	0.088	21.03	0.94	7.12	0.27	95.5	3.5	37.1	1.4	187.3	6.9	44.1	1.8	448	17	93.2	3.3	11660	410	2.38	0.11	1070	37	1266	45
CP006-24	59.5	0.77		894000	37000	6.5	1.1	2.64	0.94	1929	84	3.32	0.2	1.76	0.8	20.4	2.5	0.78	0.31	5	1.7	4.04	0.47	1.79	0.13	23.3	1.2	8.74	0.4	125.6	5.4	52.8	2.3	285	12	72	3.1	767	34	167.6	7.2	9740	380	0.743	0.046	68.2	3.1	198.1	8.3
CP006-25	79.4	1		896000	36000	6.4	1.1	0.279	0.036	1091	40	1.052	0.079	0.0134	0.005	11.34	0.46	0.158	0.016	2.4	0.17	3.85	0.26	1.616	0.095	17.49	0.77	5.63	0.23	75.4	2.9	30.5	1.2	161.7	6.3	40.4	1.5	437	18	100	3.9	9740	370	0.291	0.022	222.7	8.2	353	13
CP006-41	81.4	1.17		848000	39000	11.3	1.5	0.234	0.038	948	41	0.877	0.076	0.00066	0.00095	4.49	0.21	0.036	0.0089	0.74	0.1	2.53	0.21	0.328	0.034	18.33	0.9	6.29	0.26	82.8	3.5	30.6	1.3	140.8	6.1	29.7	1.3	259	11	45.6	1.9	10660	440	0.33	0.025	68.1	2.8	126.9	5.2
CP006-45	60.2	0.76		804000	42000	4.44	0.91	0.51	0.19	971	31	4.72	0.22	0.68	0.6	36.4	1.8	0.21	0.11	1.94	0.57	3.08	0.25	1.136	0.087	14.81	0.58	5.29	0.18	71.9	2.5	28.47	0.93	150.5	4.9	37.1	1.3	388	13	82.4	3	11370	420	1.933	0.088	449	15	764	25
CP006-51	58.8	0.75		886000	38000	8.8	1.5	0.561	0.076	646	25	3.27	0.17	0.41	0.12	26.3	1.1	0.161	0.029	1.43	0.18	2.15	0.21	0.806	0.058	10.72	0.54	3.65	0.15	49.7	1.9	19.67	0.68	105.4	4	25.5	0.95	268	9.9	58.1	2.2	10770	390	1.45	0.073	366	16	587	22
CP006-52	82.3	1.02		882000	42000	10.3	2.2	1.52	0.25	781	51	2.02	0.16	1.02	0.26	15.52	0.97	0.21	0.049	1.07	0.17	1.66	0.19	0.182	0.027	10.58	0.92	3.98	0.31	59.1	4.4	24.1	1.6	130.4	8.1	31.8	1.6	317	15	62.3	2.8	14270	510	1.93	0.1	258	12	719	43
CP006-53	59.3	0.74		895000	44000	4.2	0.87	0.297	0.038	956	39	5.38	0.27	0.0064	0.0036	37.1	1.4	0.053	0.011	0.99	0.11	2.19	0.17	0.919	0.06	13.4	0.57	5.04	0.21	68.9	2.6	28.1	1.1	150	6	37.2	1.4	392	15	83.1	3.5	10810	450	2.139	0.098	412	15	739	27
CP006-54	72.2	0.91		927000	37000	4.45	0.99	0.365	0.075	795	36	6.38	0.4	0.0111	0.0044	12.6	0.58	0.0373	0.0082	0.601	0.096	1.71	0.16	0.488	0.044	11.36	0.62	4.38	0.23	60.6	2.8	25	1.1	131.4	5.8	31.6	1.3	319	13	65.8	2.4	11500	440	2.76	0.15	166.7	7.7	724	35
CP006-59	61.5	0.78		704000	50000	7.9	1.6	117	23	569	24	2.47	0.15	329	65	760	150	76	15	299	59	43.8	8.2	6.6	1.2	37	5.8	5.95	0.64	53.8	3.6	17.64	0.78	85.6	3.2	20.22	0.75	204.7	7.7	44.8	1.6	12260	430	1.234	0.068	300	11	505	16
CP006-60	61.8	0.77		743000	35000	5.1	1.2	0.393	0.056	854	32	5.03	0.28	0.217	0.047	41.1	1.4	0.089	0.016	1.24	0.14	2.33	0.23	0.874	0.061	13.05	0.59	4.55	0.18	63.8	2.3	25.08	0.9	132.5	4.6	32.3	1.2	327	13	71.3	2.5	12430	360	2.2	0.1	579	17	828	23
CP006-61	61.1	0.76		803000	42000	5	1	0.645	0.095	1011	30	5.75	0.24	0.65	0.16	44.3	1.3	0.254	0.048	2.02	0.23	2.98	0.23	1.061	0.068	15.68	0.65	5.48	0.19	75.3	2.5	29.12	0.91	155.7	5.2	38.6	1.2	397	12	83.3	2.7	12220	460	2.4	0.1	782	37	1155	43
CP006-64	60.2	0.75		909000	36000	4.99	0.96	0.228	0.036	847	37	4.65	0.27	0.003	0.0021	33.2	1.4	0.058	0.011	0.896	0.099	2.12	0.17	0.88	0.065	12.21	0.5	4.34	0.18	60.8	2.5	24.53	0.95	131.1	5.5	32.4	1.4	333	14	74.6	3.2	10890	390	2.03	0.1	452	19	733	25
CP006-67	59.7	0.78		949000	37000	7.9	1.3	7.1	2.2	573	41	1.36	0.1	13	4.1	40.1	9.4	3.06	0.91	16.5	5	5.23	0.96	1.24	0.15	14.8	1.5	4.39	0.38	51.9	4.1	18.4	1.3	88.5	6.1	19.4	1.2	187	11	39.8	2.3	9660	320	0.575	0.04	101.5	7.6	157.6	8.5
CP006-68	57	0.7		709000	41000	21.8	5	1.81	0.21	888	41	4.8	0.25	2.06	0.38	41.4	1.6	0.504	0.079	2.79	0.35	2.65	0.22	1.019	0.077	14.22	0.78	4.9	0.23	68.1	2.9	26.8	1.2	140.4	6.4	35	1.5	362	15	76.8	3.4	11630	440	1.9	0.089	524	26	794	31
CP006-69	59.4	0.76		686000	34000	3.23	0.83	0.315	0.045	1481	63	3.23	0.16	0.0041	0.0028	38.1	1.6	0.15	0.018	2.9	0.24	5.73	0.38	1.98	0.12	26.1	1.2	8.44	0.35	109.9	4	41.4	1.6	211.4	8.3	52.6	2.4	545	26	113.4	4.8	13310	390	1.59	0.075	763	44	1097	64
CP006-71	61.4	0.78			36000	5.5	1	0.59	0.14	865	41	4.21	0.24	0.69	0.29	35.9	1.4	0.21	0.062	1.7	0.27	2.41	0.21	0.947	0.059	13.82	0.71	4.88	0.23	64.6	2.9	25.4	1.2	131.9	6.1	32	1.6	317	16	69.9	3.3	10950	410	1.672	0.081	521	19	745	26
CP006-74	60.3	0.82
CP006-72	61	0.76		860000	36000	7	1.2	0.31	0.038	1113	35	6.35	0.27	0.0053	0.003	46	1.6	0.054	0.011	1.22	0.13	2.65	0.21	1.01	0.066	15.73	0.6	5.63	0.2	79.1	2.5	32.3	1.1	172.6	5.7	42.2	1.5	429	14	94.4	3.2	11420	380	2.42	0.1	533	17	883	29
CP006-75	59.4	0.74
CP006-77	58.9	0.73		839000	40000	4.22	0.94	1.14	0.24	576	24	2.17	0.14	2.43	0.6	25.5	1.7	0.59	0.14	2.87	0.51	2.58	0.24	0.876	0.06	10.46	0.51	3.48	0.16	45.8	1.8	17.42	0.7	90.2	3.5	22.42	0.89	233.2	8.6	49.5	2	11610	440	1.076	0.058	263	11	451	16
CP006-78	59.2	0.73		806000	34000	6.5	1.4	0.79	0.22	908	37	6.24	0.31	0.0092	0.0045	39.3	1.6	0.049	0.0093	0.97	0.11	2.06	0.18	0.843	0.059	13.32	0.67	4.69	0.21	66.1	2.7	26.8	1	145	5.9	36.1	1.5	373	16	80.5	3.1	11550	420	2.52	0.11	480	18	884	34
CP006-79	60.1	0.83		813000	40000	6.9	1.1	0.236	0.041	611	33	0.849	0.07	0.0048	0.0035	5.78	0.32	0.057	0.011	0.98	0.13	2.12	0.23	0.759	0.064	10.68	0.68	3.66	0.22	47.7	2.7	19.1	1.1	101.3	5.5	24.2	1.3	244	13	54.6	2.7	10020	370	0.284	0.025	39.7	2.5	83.9	4.6
CP006-80	71.7	0.86		865000	40000	2.53	0.69	3.5	0.39	2166	73	9.21	0.41	6.72	0.82	24.4	2.5	2.63	0.34	13.5	1.6	6.6	0.49	0.391	0.044	29.4	1.1	11.1	0.36	159.7	5.2	64.4	2.1	330	11	76	2.7	715	25	139.3	4.8	12580	450	5.31	0.2	401	13	2371	76
CP006-81	71.9	0.9		920000	35000	5.29	0.99	0.235	0.036	327	13	0.808	0.065	0.0173	0.0062	5.31	0.2	0.0218	0.0062	0.284	0.056	0.653	0.083	0.331	0.031	3.98	0.25	1.512	0.067	20.84	0.81	9.44	0.36	55.3	2.1	15.61	0.61	184.5	7.1	45.6	1.8	10040	370	0.244	0.021	64.5	2.5	168.8	6.1
CP006-82	72.7	1.04		854000	38000	9.4	1.3	0.341	0.047	1791	88	1.99	0.12	0.0195	0.0069	15.28	0.73	0.278	0.028	4.19	0.34	6.86	0.46	2.22	0.15	33.4	1.7	10.42	0.51	135	6.3	51.7	2.5	256	12	57.5	2.7	541	26	112.1	5.3	8460	320	0.759	0.044	325	17	332	16
CP006-90	72.5	0.87		783000	36000	3.92	0.89	0.647	0.092	1013	52	2.81	0.16	0.78	0.14	5.57	0.31	0.346	0.049	2.94	0.23	4.67	0.36	0.501	0.046	22.6	1.3	7.33	0.38	87.9	4.5	31	1.5	148.9	6.5	32.6	1.5	300	13	60.3	2.4	11980	430	1.124	0.06	162.9	7.9	668	28
CP006-91	60.6	0.75		814000	37000	4.19	0.89	2.08	0.49	1010	36	5.69	0.28	4.5	1.2	49.5	3	1.12	0.28	4.9	1.1	3	0.24	1.009	0.068	14.62	0.6	5.2	0.19	73.5	2.6	29.5	1	158.6	5.7	38.5	1.3	396	14	86.3	3	12050	430	2.2	0.1	461	16	765	26
CP011-10	42.5	0.59		776000	36000	6.3	1.1	0.235	0.039	839	27	1.57	0.1	0.0026	0.0022	4.47	0.19	0.0258	0.0068	0.612	0.086	1.78	0.16	0.316	0.033	13.3	0.58	5.02	0.18	70.9	2.6	28	0.97	139.2	5	30.6	1.1	283	10	55.4	2	9660	340	0.576	0.032	65.1	2.2	185.4	6.1
CP011-11	70.4	0.89		625000	28000	12.2	2	123	18	565	20	1.39	0.12	187	27	395	55	42.5	6.3	163	24	26.6	3.7	3.65	0.42	27.3	2.6	5.35	0.33	54.1	2.4	17.95	0.69	85.5	2.9	19.36	0.66	188.3	6.5	37.9	1.2	11240	320	0.586	0.035	158.8	5.5	295	11
CP011-12	43.3	0.59		764000	36000	6.7	1.2	0.243	0.034	943	39	2.65	0.17	BDL	1.3e-07	2.32	0.16	0.0175	0.0056	0.571	0.085	2.25	0.2	0.256	0.036	16.93	0.88	6.27	0.28	84.4	3.6	31.9	1.3	150	6	31.5	1.3	280	10	56	2.2	10630	330	0.908	0.055	122.4	8.9	260	14
CP011-13	72.7	0.98		751000	36000	90	22	0.257	0.038	294.7	9.3	2.55	0.14	0.043	0.019	9.82	0.42	0.038	0.0094	0.58	0.1	1.02	0.11	0.333	0.036	5.24	0.31	1.756	0.08	22.47	0.77	9.01	0.32	47.3	1.6	11.6	0.39	117.9	3.8	25.37	0.85	12110	400	0.97	0.043	115.3	3.7	320	10
CP011-27	73.4	0.98
CP011-28	39.9	0.53
CP011-19	71.5	0.9		902000	39000	10.6	1.4	0.309	0.042	776	34	2.97	0.18	0.0006	0.00085	13.59	0.65	0.0363	0.0086	0.731	0.097	2.14	0.19	0.309	0.032	12.27	0.67	4.41	0.2	61.5	2.6	24.7	1.1	126.9	6	29.4	1.3	282	13	54.1	2.4	13840	590	1.418	0.078	135.1	5.9	431	23
CP011-31	42.1	0.54		738000	42000	4.06	0.92	0.222	0.031	814	31	0.782	0.075	BDL	1.8e-07	3.41	0.18	0.0296	0.0086	0.72	0.12	2.38	0.22	0.439	0.054	13.45	0.69	4.91	0.23	67	2.8	26	1.1	130.6	5.3	29.5	1.2	274	11	58.4	2.3	10860	370	0.317	0.029	59.9	2.5	151.7	6.2
CP011-36	42.1	0.57		761000	36000	7.2	1.3	0.225	0.035	483	16	1.221	0.081	BDL	1.3e-07	5.85	0.25	0.0151	0.0062	0.254	0.052	0.96	0.12	0.166	0.027	6.73	0.35	2.51	0.1	37.2	1.4	15.34	0.53	79.6	2.6	18.29	0.63	175.9	6.1	37.2	1.2	12240	380	0.577	0.034	58.8	1.8	176.1	5.7
CP011-39	43.5	0.57		742000	34000	8.8	1.3	0.189	0.035	766	27	2.11	0.14	BDL	1.3e-07	1.303	0.082	0.0185	0.0065	0.552	0.094	1.72	0.16	0.166	0.024	11.59	0.49	4.43	0.19	63.9	2.4	25.32	0.96	125.8	4.6	27.5	1	249.9	8.9	51.3	1.8	9750	310	0.603	0.039	33.7	1.8	122.2	5.2
CP011-4	49.5	0.64		759000	37000	6.4	1.2	0.303	0.047	511	21	1.074	0.082	0.046	0.013	7.82	0.38	0.0442	0.0099	0.636	0.095	1.48	0.16	0.623	0.054	7.57	0.44	2.73	0.13	37.6	1.5	15.67	0.65	85.7	3.6	21.47	0.89	235.9	9.7	55.8	2.3	10630	360	0.427	0.031	86.3	4.8	226	11
CP011-40	73.1	0.95		703000	37000	10.2	1.7	0.301	0.042	1054	38	4.29	0.23	0.0007	0.001	11.22	0.45	0.076	0.014	1.53	0.16	3.24	0.26	0.856	0.06	17.22	0.74	5.96	0.24	80.5	2.7	32.1	1.2	165.7	5.9	38.6	1.4	380	14	82	2.8	11710	380	1.362	0.074	246	8.4	787	25
CP011-42	43	0.58		707000	35000	7.3	1.4	10.5	1.8	1013	34	1.91	0.12	25.1	4.6	69	12	8.5	1.6	38.3	6.8	9.9	1.5	0.83	0.11	19	1.5	5.51	0.27	75.1	2.7	31	1.1	165.1	5.6	38.9	1.3	382	13	84.8	2.9	10200	330	0.7	0.04	98.5	3.4	269.8	8.8
CP011-43	43.1	0.57		855000	42000	42.6	9.2	6.6	2.2	1590	300	3.08	0.57	4	1.6	32.5	5.1	1.29	0.44	7	1.7	7	1.3	2.47	0.48	32.5	6.6	10.4	2.1	128	25	45.6	8.4	214	38	46.6	7.8	438	68	90	13	9910	330	0.62	0.079	372	80	364	57
CP011-44	43.6	0.58		909000	34000	6.6	1	0.241	0.033	1144	41	3.72	0.17	0.0003	0.00061	3.1	0.14	0.0272	0.0065	0.913	0.087	3.17	0.22	0.298	0.033	23.01	0.92	7.83	0.26	100.2	3.3	35.5	1.2	157.2	5.6	32	1.1	280.6	9.8	53.7	1.9	10810	350	1.241	0.057	170.3	6.5	369	13
CP011-45	43	0.61		913000	42000	5.2	1	0.2	0.031	545	23	0.78	0.071	BDL	1.3e-07	2.59	0.13	0.0107	0.004	0.444	0.078	1.28	0.15	0.245	0.03	8.29	0.43	3.14	0.15	43.8	1.9	17.57	0.76	89.1	3.8	20.77	0.9	200.8	8.3	40.9	1.7	10420	390	0.281	0.025	32.7	1.2	94.5	3.4
CP011-46	72.9	0.9		882000	37000	36.7	5.9	9.17	0.98	858	65	1.74	0.14	1.03	0.29	3.32	0.63	0.373	0.067	3.49	0.44	5.37	0.55	0.195	0.029	21.4	1.9	6.61	0.51	77.5	5.5	27.3	2	125.5	8.9	25.2	1.7	223	15	41	2.7	9310	360	0.588	0.042	101.3	8.3	261	18
CP011-48	43.2	0.61		870000	40000	6.17	0.96	0.297	0.035	1021	35	2.3	0.12	0.059	0.019	12.17	0.46	0.052	0.011	0.86	0.1	1.86	0.16	0.522	0.039	11.4	0.51	4.43	0.17	66.8	2.4	28.9	1	160.3	5.6	39.6	1.4	416	15	93.5	3.2	10960	370	0.753	0.042	191.7	6.1	386	12
CP011-5	43.5	0.61		749000	33000	15	1.7	0.228	0.032	970	31	2.13	0.13	BDL	1.3e-07	2.65	0.12	0.0401	0.008	0.94	0.11	2.55	0.24	0.285	0.031	16.03	0.66	5.85	0.2	80.8	2.8	31.8	1.1	159.8	5.2	35.5	1.2	327	11	66.7	2.2	9240	280	0.719	0.043	37.3	1.2	113.8	3.3
CP011-7	74.2	0.93		671000	38000	4.9	1.1	0.39	0.053	1095	56	2.73	0.19	BDL	1.9e-07	11.97	0.65	0.0148	0.0056	0.543	0.092	1.46	0.15	0.537	0.057	10.82	0.56	4.21	0.21	68.1	3.1	31.4	1.4	186.2	8.6	48.5	2.3	538	26	128.9	5.5	12570	430	0.732	0.053	100.9	6	363	21
CP011-29	41.1	0.52
CP011-9	43.1	0.55		675000	28000	9.3	1.6	0.76	0.12	1709	57	4.21	0.21	0.185	0.047	20.72	0.89	0.087	0.015	1.42	0.16	3.46	0.29	0.466	0.043	25.5	1.1	9.56	0.36	131.4	4.6	51.3	1.8	254.3	9.1	55	2	501	18	100.2	3.2	13360	380	1.596	0.078	743	34	985	37
CP023-21	10.4	0.14		708000	51000	8.1	1.6	113	23	566	25	2.46	0.15	322	66	740	150	75	15	292	59	43	8.3	6.5	1.2	36.1	5.8	5.86	0.65	53.2	3.7	17.48	0.79	85.1	3.3	20.14	0.77	203.5	7.9	44.4	1.5	12210	440	1.228	0.068	299	11	501	17
CP023-63	11.6	0.16		851000	39000	11.3	1.5	0.23	0.038	947	41	0.874	0.076	0.00067	0.00096	4.5	0.22	0.0352	0.0088	0.75	0.1	2.54	0.21	0.329	0.034	18.35	0.91	6.27	0.26	82.8	3.6	30.6	1.3	140.6	6.1	29.7	1.3	259	11	45.6	1.9	10640	440	0.331	0.025	67.9	2.8	126.8	5.2
CP023-25	10.2	0.22		866000	41000	2.6	0.7	3.39	0.39	2175	72	9.24	0.41	6.44	0.81	23.5	2.4	2.54	0.33	13	1.6	6.46	0.48	0.386	0.043	29.6	1.1	11.14	0.35	160.3	5.1	64.7	2.1	331	11	76.3	2.6	716	24	139.4	4.7	12610	450	5.25	0.19	403	12	2372	74
CP023-26	43.2	0.57		796000	34000	5.7	1.1	0.53	0.1	908	39	6.22	0.32	0.0059	0.0035	39.4	1.7	0.0468	0.0093	0.96	0.11	2.06	0.18	0.852	0.061	13.37	0.7	4.7	0.22	66.3	2.8	26.9	1.1	145.3	6.1	36.2	1.6	374	16	80.3	3.3	11590	440	2.52	0.12	483	19	889	35
CP023-66	20.5	0.27		621000	35000	7.5	1.4	0.358	0.051	2163	82	1.55	0.12	0.0067	0.0044	17.28	0.91	0.192	0.027	3.92	0.28	8.89	0.58	0.883	0.073	45.3	1.8	14.33	0.55	182.1	6.9	66.1	2.5	303	12	63.6	2.6	563	26	100.2	3.8	13670	420	1.101	0.08	320	20	548	37
CP023-27	63.7	0.78		829000	40000	4.42	0.94	1.15	0.23	580	24	2.17	0.14	2.52	0.59	25.7	1.7	0.62	0.14	2.98	0.51	2.59	0.23	0.887	0.06	10.56	0.51	3.5	0.16	46	1.8	17.55	0.69	90.8	3.5	22.59	0.88	235	8.5	49.9	2	11690	430	1.082	0.057	265	11	454	16
CP023-30	12.2	0.17		811000	43000	5	1	0.646	0.098	1012	31	5.73	0.25	0.69	0.17	44.2	1.3	0.258	0.049	2.04	0.24	2.97	0.24	1.061	0.068	15.69	0.67	5.5	0.2	75.4	2.5	29.08	0.93	155.7	5.3	38.8	1.2	398	12	83.2	2.7	12170	470	2.41	0.1	780	38	1148	44
CP023-31	42.3	0.58		736000	35000	4.8	1.2	0.399	0.058	846	32	4.96	0.28	0.219	0.048	40.6	1.5	0.091	0.017	1.26	0.14	2.32	0.22	0.869	0.06	13.05	0.61	4.51	0.18	63.5	2.3	24.88	0.92	131.4	4.7	32.1	1.2	322	13	70.6	2.6	12420	380	2.18	0.11	581	17	823	25
CP023-24	9.8	0.16		826000	41000	6.8	1.1	0.216	0.038	626	33	0.85	0.071	0.00038	0.00076	5.82	0.33	0.057	0.011	1.02	0.13	2.16	0.23	0.774	0.065	10.93	0.69	3.75	0.22	48.9	2.7	19.6	1.1	103.5	5.5	24.7	1.3	248	13	55.5	2.7	9970	380	0.28	0.024	40.8	2.5	85.4	4.6
CP023-35	13	0.22		791000	38000	3.85	0.88	0.632	0.096	1020	54	2.79	0.17	0.78	0.15	5.61	0.33	0.35	0.051	2.98	0.24	4.75	0.37	0.512	0.047	22.8	1.3	7.44	0.39	89	4.7	31.4	1.5	150.3	6.7	32.9	1.6	301	14	60.4	2.5	11970	450	1.126	0.06	164.9	8.2	670	29
CP023-36	10.5	0.14		854000	38000	9.4	1.3	0.333	0.047	1796	89	1.99	0.12	0.0192	0.0068	15.3	0.75	0.28	0.028	4.2	0.33	6.9	0.46	2.23	0.15	33.4	1.7	10.47	0.51	135.5	6.3	51.9	2.5	257	12	57.8	2.7	542	26	112.1	5.3	8470	320	0.758	0.044	326	17	332	16
CP023-38	67.6	0.84		625000	26000	20.2	2.6	0.288	0.043	2027	78	1.01	0.095	0.038	0.011	11.88	0.48	0.354	0.029	5.09	0.28	8.95	0.51	1.234	0.08	39.7	1.4	12.4	0.4	158.2	5.8	59.2	2.3	276	11	55.4	2.1	469	18	91.5	3.6	11310	350	0.591	0.039	281	12	348	16
CP023-40	18.8	0.3		664000	31000	10.5	1.6	0.417	0.053	2620	150	1.78	0.16	0.0082	0.0052	16.49	0.91	0.177	0.022	3.94	0.41	8.87	0.67	1.64	0.12	51.2	3.2	17.3	1	223	13	81.6	4.8	369	21	75.3	4.3	655	36	125.5	6.8	11070	320	0.69	0.053	256	19	290	17
CP023-42	32.8	0.47		805000	37000	4.16	0.91	2.12	0.49	1012	36	5.7	0.28	4.6	1.2	49.5	3	1.14	0.29	5	1.1	3.01	0.25	1.006	0.07	14.74	0.63	5.22	0.19	73.8	2.6	29.5	1	158.9	5.7	38.6	1.3	396	14	86.3	3.1	12080	440	2.19	0.1	463	16	761	26
CP023-83	72.1	0.89		725000	33000	8.1	1.5	23	8.5	738	45	1.61	0.13	46	17	114	37	9.3	3.4	36	13	9.4	2.2	2	0.33	19.2	1.9	5.43	0.37	66.5	4.1	23.9	1.4	113.2	6.7	25	1.4	251	14	51.7	2.8	10790	390	0.732	0.05	127.7	8.9	199	12
CP023-43	48.6	0.63		681000	30000	13.7	1.8	0.568	0.059	4380	150	1.355	0.084	0.0158	0.006	18.73	0.76	0.248	0.026	4.7	0.3	11.55	0.6	2.37	0.12	70.4	2.6	24.96	0.82	339	11	131.2	4.4	622	20	128.2	4.3	1115	38	219.8	6.9	10600	290	0.425	0.031	197.8	6.5	233.2	7.4
CP023-2	11	0.18		942000	42000	12.8	1.7	0.316	0.04	1262	47	2.59	0.14	0.0015	0.0018	15.88	0.71	0.068	0.012	1.36	0.14	3.13	0.21	0.88	0.067	19.01	0.86	6.71	0.25	92.8	3.5	37.4	1.4	192.1	7.3	43.2	1.6	413	16	84.1	3.4	8610	320	0.965	0.056	115.5	4	190.3	7
CP023-3	11	0.2		909000	36000	4.93	0.95	0.225	0.035	829	37	4.56	0.27	0.0023	0.0018	32.6	1.4	0.056	0.011	0.9	0.1	2.09	0.17	0.865	0.065	12.01	0.5	4.26	0.17	59.5	2.4	23.98	0.94	128.4	5.5	31.7	1.4	327	15	73.3	3.3	10800	380	1.982	0.098	448	19	721	24
CP023-45	30.1	0.39		702000	29000	6.1	1.1	0.533	0.059	4200	250	2.23	0.18	0.0254	0.0088	11.38	0.95	0.394	0.043	7.66	0.65	17.4	1.4	3.47	0.28	91.5	6.7	29.6	2	371	24	129.1	7.9	580	35	116.7	6.8	996	58	186	11	10010	310	0.71	0.048	424	41	630	39
CP023-46	27.5	0.38		729000	37000	14.5	2.1	0.298	0.042	1698	93	0.957	0.089	0.0069	0.0039	8.08	0.4	0.158	0.023	2.54	0.22	5.34	0.38	1.03	0.089	30.5	1.8	10.41	0.62	138.2	7.6	51.3	2.8	237	13	48	2.6	412	20	79.3	4	9980	290	0.395	0.031	115.4	8.1	145.4	7.9
CP023-4	47.4	0.59		956000	42000	4.27	0.92	0.283	0.037	924	39	5.25	0.27	0.0068	0.0038	36.2	1.5	0.055	0.011	0.95	0.11	2.09	0.16	0.894	0.056	13.01	0.55	4.85	0.2	66.3	2.5	26.8	1	144.4	5.9	36.2	1.5	384	15	80	3.4	10300	420	2.07	0.097	400	15	718	28
CP023-5	80.3	0.99		933000	37000	4.02	0.91	0.341	0.061	790	35	6.39	0.39	0.0103	0.0041	12.57	0.58	0.0362	0.0081	0.591	0.096	1.68	0.16	0.488	0.043	11.28	0.61	4.37	0.22	60.2	2.8	24.9	1.1	131	5.7	31.5	1.2	319	13	65.8	2.3	11420	440	2.75	0.15	166.4	7.5	717	34
CP023-6	73.1	0.92		903000	38000	8.7	1.5	0.541	0.073	638	25	3.25	0.17	0.36	0.11	26	1.1	0.15	0.026	1.35	0.17	2.15	0.21	0.795	0.057	10.52	0.54	3.6	0.15	49.2	1.9	19.44	0.68	104.6	4	25.2	0.94	267	10	57.7	2.2	10630	390	1.433	0.072	361	16	578	22
CP023-49	45.9	0.58		881000	37000	37.2	5.8	8.96	0.98	874	64	1.74	0.14	1	0.28	3.33	0.61	0.373	0.066	3.75	0.48	5.5	0.56	0.2	0.029	22	1.9	6.77	0.52	79.5	5.7	28	2	128.5	9	25.7	1.8	226	15	41.7	2.7	9410	360	0.596	0.043	104	8.5	266	18
CP023-9	71.3	0.88		879000	43000	10.4	2.3	1.58	0.26	788	52	2.04	0.16	1.04	0.26	15.75	0.96	0.213	0.05	1.1	0.18	1.7	0.2	0.184	0.027	10.74	0.92	4.02	0.31	59.7	4.5	24.4	1.7	131.5	8.3	31.9	1.7	319	15	62.3	2.9	14270	520	1.93	0.1	255	13	704	40
CP023-10	10.2	0.18		784000	32000	5.61	0.97	0.5	0.068	1199	56	2.51	0.16	0.097	0.022	16.64	0.71	0.092	0.018	1.38	0.15	4.1	0.25	1.314	0.081	24.68	0.96	7.93	0.3	97.7	4	35	1.5	162.7	7.1	35.6	1.6	327	15	65.2	2.9	11620	370	0.643	0.041	116.9	5.7	166.6	6.9
CP023-52	32.6	0.43		913000	41000	24.4	5.1	6.7	2.2	1050	230	2.27	0.46	4.1	1.6	25.7	4.6	1.12	0.4	6	1.7	4.42	0.92	1.65	0.35	20.6	5	6.8	1.6	87	20	32.3	6.9	158	32	35.2	6.6	341	61	73	12	9890	390	0.515	0.071	250	66	293	53
CP023-53	22	0.36		759000	31000	4.52	0.96	0.272	0.046	759	27	4.03	0.2	0.0262	0.0081	33.4	1.3	0.0418	0.0096	0.82	0.11	1.83	0.16	0.79	0.057	11.64	0.53	4.07	0.16	57.4	2.1	22.78	0.81	121.4	4.5	29.5	1.1	300	11	66.6	2.5	12080	420	1.752	0.079	403	16	677	25
CP023-11	74.4	0.92		957000	37000	7.6	1.3	7.1	2.2	566	40	1.35	0.1	13.2	4.1	40.5	9.5	3.09	0.92	16.6	5	5.24	0.97	1.22	0.15	14.7	1.5	4.35	0.38	51.3	4	18.2	1.3	87.6	6	19.2	1.2	186	11	39.6	2.3	9590	320	0.57	0.04	100.7	7.6	156.4	8.4
CP023-12	22.2	0.31		699000	31000	10.8	1.4	0.265	0.036	1409	63	1.45	0.16	0.039	0.011	10.15	0.56	0.103	0.016	1.93	0.19	4.35	0.32	0.905	0.066	23.41	0.79	8.02	0.24	111.7	3.8	43.5	1.6	211.3	8.3	45.8	2	407	18	81.5	3.6	11080	300	0.507	0.04	134.2	7	196	11
CP023-54	41.2	0.52		820000	34000	5.05	0.98	0.28	0.05	669	33	1.168	0.088	0.0148	0.0062	11.07	0.59	0.051	0.01	0.95	0.12	2.3	0.2	0.841	0.071	12.23	0.69	4.13	0.21	53.7	2.6	20.8	1	106	5.3	24.5	1.3	242	12	53.4	2.6	11330	430	0.386	0.03	98.8	5.9	204	11
CP023-13	22.2	0.34		720000	31000	11.2	1.7	0.431	0.054	2480	140	1.142	0.092	0.0016	0.0016	9.41	0.57	0.144	0.021	2.65	0.29	6.42	0.55	1.189	0.099	42.2	2.8	14.84	0.91	201	12	76.9	4.4	354	20	73.1	4.1	636	34	125.4	6.3	10500	260	0.437	0.032	104.5	9.1	145	8.6
CP023-55	50	0.65		925000	36000	6.2	1	0.91	0.28	1892	89	3.23	0.21	0.39	0.25	16.9	1.4	0.22	0.12	2.27	0.6	3.44	0.3	1.67	0.11	22.4	1.2	8.44	0.39	123.1	5.6	51.9	2.4	281	13	71	3.2	760	36	164.9	7.6	9620	400	0.716	0.048	67.1	3.3	195.1	8.8
CP023-56	27.5	0.36		850000	40000	6.2	1	0.297	0.038	1018	37	2.31	0.13	0.059	0.02	12.21	0.48	0.05	0.012	0.84	0.11	1.83	0.16	0.508	0.04	11.27	0.53	4.39	0.17	66.3	2.4	28.7	1.1	160.7	5.9	39.7	1.5	411	15	94.1	3.3	11060	390	0.758	0.045	191.6	6.3	387	12
CP023-57	10.7	0.2		901000	36000	6.3	1.1	0.283	0.036	1090	40	1.041	0.078	0.0137	0.0051	11.31	0.46	0.159	0.017	2.41	0.17	3.75	0.25	1.614	0.097	17.59	0.79	5.61	0.23	75.4	3	30.3	1.2	161.5	6.4	40.3	1.6	437	18	99.9	4	9720	370	0.288	0.022	222.4	8.3	352	13
CP023-58a	95.1	1.19		675000	36000	2.88	0.79	0.304	0.044	1409	55	3.12	0.16	0.0039	0.0027	36.6	1.3	0.146	0.018	2.73	0.24	5.47	0.37	1.91	0.13	24.92	0.98	8.1	0.31	106.1	3.5	40	1.4	202.1	7	49.4	1.9	515	22	109.7	4.4	13280	400	1.537	0.072	716	36	1014	53
CP023-60	24	0.32		699000	42000	15.8	2.9	1.78	0.21	905	45	4.76	0.27	2.13	0.42	42.2	1.8	0.507	0.086	2.87	0.41	2.71	0.23	1.033	0.083	14.46	0.85	4.94	0.25	69	3.2	27.2	1.3	142.6	6.9	35.3	1.7	364	16	78.1	3.8	11780	460	1.917	0.098	532	27	805	34
CP023-84	11.8	0.53
CP023-17	89.5	1.13
CP023-19	52.6	0.73		916000	36000	5.23	0.99	0.227	0.036	326	13	0.804	0.066	0.0182	0.0067	5.29	0.21	0.0215	0.0062	0.283	0.058	0.662	0.085	0.33	0.031	3.94	0.25	1.506	0.068	20.84	0.84	9.43	0.36	55.3	2.2	15.59	0.63	183.4	7.2	45.6	1.8	10030	380	0.244	0.022	64.1	2.5	167	6
CP405-18	15.6	0.38		753000	36000	88	22	0.252	0.037	296.1	9.4	2.54	0.14	0.043	0.019	9.82	0.41	0.0382	0.0093	0.58	0.1	1.04	0.12	0.333	0.036	5.24	0.31	1.76	0.079	22.56	0.77	9.04	0.32	47.5	1.5	11.62	0.38	118.1	3.8	25.29	0.84	12100	390	0.965	0.042	115.2	3.7	320	10
CP405-17	16.4	0.42		675000	38000	4.9	1.1	0.369	0.05	1095	58	2.68	0.18	BDL	5.6e-07	12.05	0.66	0.0145	0.0056	0.54	0.094	1.46	0.16	0.545	0.058	10.87	0.57	4.21	0.22	68.2	3.2	31.5	1.5	186.6	8.8	48.6	2.3	538	27	129.1	5.6	12600	430	0.739	0.054	101.2	6.1	365	21
CP405-35	17.1	0.35		908000	42000	5	0.96	0.195	0.03	557	24	0.793	0.07	BDL	2.6e-07	2.64	0.14	0.0138	0.0048	0.44	0.074	1.32	0.15	0.247	0.029	8.44	0.44	3.2	0.15	44.6	2	18.08	0.84	91	4	20.97	0.91	203.2	8.6	41.6	1.8	10480	390	0.288	0.025	33.1	1.2	95.4	3.3
CP405-24	17.8	0.31		788000	39000	5.6	1.1	0.336	0.049	1885	92	1.23	0.11	0.0098	0.0058	8.59	0.42	0.145	0.022	2.6	0.26	5.52	0.39	1.122	0.095	34.7	1.9	11.75	0.61	152.4	7.7	57.7	2.8	274	13	57	2.7	503	24	101	4.6	10000	360	0.494	0.034	166.7	7.8	247	11
CP405-9	20.7	0.36		736000	41000	5.1	1.1	0.234	0.035	789	31	0.784	0.074	BDL	4.3e-07	3.36	0.17	0.0299	0.0084	0.69	0.11	2.27	0.21	0.409	0.049	12.95	0.69	4.71	0.23	64.7	2.9	25.2	1.1	126.8	5.2	28.6	1.2	268	11	56.6	2.1	10850	340	0.317	0.027	58.1	2.5	148.8	6
CP405-7	21.4	0.38		894000	38000	11.4	1.6	0.312	0.04	774	32	2.97	0.17	0.00055	0.00078	13.68	0.63	0.034	0.008	0.733	0.091	2.13	0.19	0.31	0.031	12.14	0.61	4.39	0.19	61.3	2.5	24.6	1	125.7	5.5	29.3	1.2	280	13	53.7	2.3	13890	560	1.407	0.073	134.3	5.7	424	22
CP405-13	22.1	0.34		738000	35000	8.7	1.4	0.189	0.035	767	28	2.12	0.14	BDL	3e-07	1.304	0.083	0.0185	0.0066	0.549	0.096	1.72	0.17	0.166	0.024	11.67	0.5	4.44	0.19	64	2.4	25.35	0.97	126.1	4.7	27.5	1	249.9	9	51.4	1.8	9790	310	0.605	0.04	33.5	1.8	122.1	5.2
CP405-19	22.4	0.31		624000	27000	12	1.9	119	18	569	20	1.39	0.11	182	27	383	55	41.1	6.2	158	23	25.9	3.7	3.58	0.41	27	2.5	5.34	0.32	54.4	2.4	18.11	0.68	86	2.9	19.51	0.66	189.7	6.4	38	1.2	11270	310	0.586	0.034	159.3	5.4	296	11
CP405-4	24	0.37		691000	31000	9.6	1.7	0.81	0.13	1706	56	4.22	0.21	0.189	0.047	20.86	0.86	0.091	0.016	1.43	0.16	3.51	0.29	0.471	0.043	25.6	1.1	9.6	0.35	131.8	4.4	51.4	1.7	254.8	8.8	55.1	1.9	502	17	100.2	3.1	13300	380	1.603	0.076	746	33	988	36
CP405-14	25.7	0.41		734000	42000	10	1.6	0.293	0.041	1039	38	4.23	0.23	0.0009	0.0011	11.05	0.45	0.075	0.013	1.51	0.16	3.17	0.26	0.852	0.058	17.04	0.73	5.84	0.24	79.4	2.8	31.6	1.2	163.2	5.9	38	1.4	373	14	80.7	2.8	11600	370	1.352	0.072	242.3	8.5	780	25
CP405-16	25.9	0.36		759000	34000	14.9	1.7	0.232	0.032	974	32	2.14	0.12	BDL	4.2e-07	2.66	0.12	0.0412	0.0082	0.96	0.11	2.56	0.23	0.293	0.033	16.16	0.67	5.86	0.2	81.4	2.9	32	1.1	160.1	5.3	35.6	1.2	328	11	67.2	2.2	9240	290	0.718	0.043	37.6	1.2	114.1	3.3
CP405-32	27	0.43		754000	35000	6.3	1.1	0.299	0.046	512	20	1.079	0.079	0.049	0.012	7.84	0.37	0.0468	0.0099	0.641	0.095	1.48	0.16	0.63	0.053	7.59	0.43	2.76	0.13	37.7	1.4	15.73	0.62	86.3	3.5	21.51	0.85	235.9	9.2	56.1	2.2	10620	340	0.426	0.03	87.3	4.6	229	11
CP405-20	28.3	0.41		774000	35000	6.1	1.1	0.235	0.041	828	29	1.58	0.11	0.0003	0.00062	4.42	0.19	0.0263	0.0073	0.601	0.088	1.77	0.17	0.328	0.037	13.23	0.6	4.99	0.2	70.5	2.7	27.8	1	139.3	5.3	30.5	1.2	282	11	55	2.1	9650	360	0.576	0.034	64.5	2.3	183.8	6.3
CP405-5	28.4	0.47		758000	36000	7.2	1.3	0.224	0.035	483	16	1.231	0.081	BDL	3.5e-07	5.85	0.25	0.0149	0.0062	0.257	0.053	0.96	0.12	0.164	0.027	6.78	0.35	2.51	0.1	37.2	1.4	15.35	0.53	79.7	2.6	18.29	0.63	176.3	6.1	37.1	1.2	12250	380	0.575	0.034	58.8	1.8	176.4	5.7
CP405-6	29.5	0.46		751000	35000	51	7.9	1.82	0.24	4670	430	8.1	1	5.71	0.93	55.7	7.6	8.5	1.4	48.2	7.5	30.3	4	6.58	0.97	89.5	9	30.2	2.9	391	36	138	12	646	57	139	12	1240	110	225	19	12530	360	2.6	0.3	1000	130	2040	240
CP405-31	29.9	0.43		769000	36000	6.9	1.2	0.242	0.035	938	39	2.62	0.17	BDL	3.8e-07	2.32	0.15	0.0176	0.0055	0.572	0.086	2.22	0.2	0.251	0.036	16.81	0.88	6.24	0.28	83.9	3.6	31.7	1.3	149.4	6	31.3	1.3	279	11	55.5	2.2	10640	340	0.893	0.054	119.8	9	258	14
CP405-25	40.3	0.61
CP405-38	43	0.62		705000	34000	7.3	1.4	10.4	1.8	1017	35	1.93	0.12	24.7	4.5	68	12	8.4	1.5	38	6.8	9.8	1.5	0.82	0.11	19	1.5	5.52	0.27	75.2	2.7	31	1.1	165.7	5.6	38.9	1.3	381	13	85	2.8	10270	330	0.703	0.039	98.8	3.4	271.7	8.8
CP212C-11	86.4	1.14		587000	10000	9.2	1.4	0.649	0.065	5640	110	1.518	0.091	0.0153	0.0068	24.63	0.72	0.271	0.03	5.7	0.35	13.76	0.59	2.38	0.11	86.5	1.8	30.54	0.64	398.1	9.3	166.3	3.8	801	19	168.6	4	1516	40	298.7	6.8	11460	230	0.492	0.031	389.7	9.3	550	16
CP212C-13	50.6	0.68		588000	13000	3.35	0.87	0.265	0.048	833	22	2.22	0.13	0.0011	0.0016	9.88	0.36	0.0279	0.0081	0.564	0.089	1.87	0.15	0.506	0.048	12.79	0.5	4.6	0.14	60.4	1.6	26.29	0.72	135.3	3.4	30.38	0.81	291.6	7.5	65.1	1.6	12970	290	0.831	0.05	97.1	5.3	199.7	6.5
CP212C-17	78.4	1.06		588000	12000	9.9	1.4	0.242	0.039	1420	42	1.218	0.091	0.0016	0.0019	7.56	0.24	0.086	0.014	2.21	0.18	4.41	0.3	0.648	0.055	24.88	0.85	8.42	0.26	103.3	2.8	42.6	1.1	200.6	5.1	42.8	1.1	376	10	75.4	1.8	11730	260	0.599	0.038	148.7	3.9	259.1	6.2
CP212C-19	74.5	1		588000	12000	8.2	1.6	0.543	0.066	5020	100	1.363	0.096	0.044	0.012	6.76	0.25	0.468	0.036	7.84	0.39	15.85	0.62	1.086	0.072	95.8	2.3	32.25	0.67	381.8	7.4	152	3	679	14	131.9	2.8	1073	22	194.8	3.9	9560	190	0.593	0.031	424	8.9	622	12
CP212C-21	78.4	1.06		598000	13000	10.2	1.5	0.326	0.048	1287	36	1.71	0.13	0.0098	0.0054	11.31	0.46	0.088	0.016	1.7	0.18	3.69	0.23	1.61	0.11	20.71	0.73	6.91	0.21	87.6	2	37.66	0.9	193.7	4.2	44.6	1	430	10	97.9	2.2	10730	220	0.758	0.07	113.7	2.8	196.3	5.2
CP212C-3	55.6	0.76		613000	13000	5.7	1.2	1.27	0.38	892	20	3.04	0.15	1.61	0.65	29.9	1.7	0.42	0.14	2.79	0.65	2.89	0.22	0.927	0.059	14.62	0.54	4.98	0.14	63	1.6	27.19	0.63	142.4	3.2	33.99	0.85	337.9	8.1	78.3	1.8	13000	270	1.141	0.047	339.8	8.2	399.6	8.7
CP212C-4	53.3	0.74		579000	11000	6.2	1.3	0.291	0.041	877	20	1.67	0.11	0.0156	0.0073	7.55	0.25	0.053	0.011	1.23	0.13	2.41	0.22	0.846	0.07	15.19	0.5	5.03	0.14	62.7	1.5	27.61	0.68	141.5	3.2	32.41	0.79	309.1	7.8	71.3	1.6	12970	260	0.554	0.033	84.1	2	183.9	4
CP212C-8	80	1.06		571000	12000	7.4	1.3	0.197	0.034	573	23	2.03	0.13	BDL		1.659	0.099	0.0223	0.0071	0.452	0.082	1.54	0.18	0.081	0.018	9.41	0.61	3.47	0.19	44.1	2	19.35	0.84	95.4	3.4	20.47	0.7	183.1	5.8	38	1.2	11740	260	1.037	0.052	49.9	2	188	4.8
CP212D-14	73.1	0.88		774000	31000	5.74	0.98	0.502	0.068	1215	55	2.55	0.15	0.1	0.022	16.86	0.7	0.094	0.018	1.39	0.15	4.08	0.25	1.302	0.082	24.76	0.95	8	0.3	98.6	3.9	35.5	1.5	164.6	6.9	36.1	1.5	332	14	66.4	2.9	11700	370	0.653	0.041	118.9	5.6	169.4	6.8
CP212D-15	73.6	0.89		690000	29000	10.9	1.4	0.261	0.036	1412	63	1.46	0.17	0.04	0.011	10.2	0.56	0.101	0.016	1.92	0.19	4.37	0.33	0.907	0.067	23.32	0.8	8.05	0.25	112.2	3.8	43.7	1.6	211.9	8.3	46	2	409	18	82	3.6	11130	290	0.512	0.04	135.1	7	198	11
CP212D-17	58.2	0.71		719000	31000	11.3	1.7	0.428	0.054	2470	140	1.142	0.092	0.0016	0.0016	9.4	0.57	0.145	0.021	2.65	0.29	6.43	0.55	1.191	0.099	42.1	2.8	14.87	0.91	201	12	77	4.4	353	20	73.1	4.1	635	34	125.7	6.3	10500	260	0.437	0.032	104.5	9.1	145.2	8.6
CP212D-23	73.4	0.89		664000	33000	19.7	2.5	0.293	0.046	1990	76	0.988	0.088	0.038	0.01	11.8	0.46	0.351	0.028	5.06	0.27	8.77	0.48	1.223	0.077	39.1	1.3	12.25	0.38	155.3	5.6	58.2	2.2	270	11	54.4	2	460	17	90.4	3.4	11180	340	0.584	0.037	279	11	350	15
CP212D-26	52.6	0.65		731000	37000	14.5	2.1	0.296	0.043	1686	93	0.957	0.09	0.007	0.0039	8.06	0.41	0.153	0.022	2.54	0.22	5.34	0.38	1.009	0.087	30.2	1.8	10.34	0.62	137.6	7.7	51.1	2.9	235	13	47.9	2.6	410	21	79.7	4.1	10010	300	0.397	0.031	114.4	8.1	144.8	8
CP212D-27	72.9	0.9		673000	30000	14	1.9	0.566	0.06	4370	150	1.361	0.083	0.0155	0.006	18.56	0.73	0.25	0.026	4.72	0.3	11.58	0.6	2.36	0.12	69.9	2.6	24.92	0.82	338	11	131.3	4.4	621	20	128.1	4.3	1107	37	221.3	6.9	10650	300	0.427	0.031	197.7	6.5	233.5	7.4
CP212D-39	73	0.91		595000	17000	10.9	2.1	17.5	2.4	1506	61	2.23	0.15	2.1	0.38	16.12	0.85	0.69	0.1	5.27	0.47	5.64	0.37	1.229	0.091	26.4	1.2	8.49	0.31	106.3	3.9	43.5	1.6	217.5	8.1	49	1.8	464	17	99	3.4	10000	240	0.809	0.048	253	12	468	20
CP212D-5	73.9	0.92		666000	29000	10.9	1.6	0.408	0.051	2550	150	1.75	0.16	0.0077	0.0048	16.14	0.89	0.17	0.022	3.82	0.4	8.62	0.66	1.6	0.12	49.4	3.2	16.8	1	217	13	79.7	4.8	360	21	73.7	4.2	639	36	123.2	6.8	11170	310	0.677	0.051	248	19	283	17
CT05-15	80.8	0.92		755000	41000	9.7	1.9	45.1	5.9	659	24	2.77	0.16	182	24	427	55	50.5	6.6	208	28	41.4	5.2	1.75	0.22	41.1	4.1	7.24	0.51	69.6	3.5	22.62	0.87	104.9	3.9	22.23	0.83	208.9	6.9	40.4	1.5	11790	450	1.301	0.079	135.6	5.1	276	10
CT05-23	81.1	0.97		948000	36000	6.1	1.3	0.169	0.03	411	23	1.48	0.15	0.094	0.022	7.76	0.5	0.18	0.3	0.469	0.098	0.82	0.12	0.353	0.043	5.36	0.36	1.9	0.11	28.2	1.4	12.49	0.72	70.8	4.2	18.3	1.2	194	13	47.6	3.6	8160	350	0.599	0.054	52	5.1	114	12
CT05-30	87.4	0.98		1048000	38000	3.9	1.1	3.29	0.76	783	33	1.527	0.089	19.6	4.7	46.6	9.3	4.3	1.1	18.1	4.4	4.16	0.82	0.447	0.059	11.3	0.87	3.76	0.19	53.5	2.1	23.07	0.91	131.8	5.1	33.2	1.2	337	13	79.9	3.1	8100	300	0.626	0.044	208.7	7.9	480	18
CT05-14	87.5	0.98		982000	41000	2.2	0.62	1.44	0.32	1509	75	1.061	0.091	5.4	1.4	22.3	3.1	1.39	0.35	6.3	1.3	4.15	0.48	0.665	0.06	20.2	1.2	7.17	0.4	100.3	5.5	41.4	2.1	223	11	54.1	2.6	559	27	125.1	5.7	9680	340	0.594	0.051	480	30	798	39
CT05-18	87.6	0.98		923000	40000	8.3	1.6	0.686	0.075	5010	170	3.41	0.22	0.111	0.021	29.4	1.4	0.532	0.042	9.04	0.49	18.66	0.94	4	0.23	99.5	4.5	32.5	1.3	417	16	154.9	5.8	731	27	156.3	5.8	1374	52	273	11	7630	290	0.825	0.057	979	48	892	38
CT05-22	87.7	0.99		732000	52000	5	1.3	52	9.6	831	33	1.65	0.12	270	52	560	110	61	12	253	49	41.9	8.1	3.11	0.55	40.3	6.1	6.95	0.73	72.7	4.9	26.6	1.3	138.2	5.5	34.6	1.3	353	14	83.8	3.2	9640	390	0.745	0.058	230	12	509	21
CT05-53	87.8	1		789000	45000	3.54	0.89	1.09	0.24	367	11	0.875	0.068	2.64	0.68	10.7	1.2	0.5	0.13	2.27	0.52	1.08	0.15	0.334	0.045	4.9	0.33	1.77	0.094	25.8	1	11.44	0.41	66.9	2.4	17.15	0.61	199.5	7.1	48.1	1.7	9500	360	0.465	0.036	161.8	5.9	369	14
CT05-1	87.9	0.99		884000	33000	13.8	1.9	1.85	0.25	1920	130	1.32	0.11	0.037	0.011	12.52	0.76	0.216	0.029	3.37	0.37	6.41	0.65	0.75	0.079	34.3	2.4	11.5	0.77	152.4	9.8	59.6	4.1	288	19	58.2	3.9	520	35	97.6	6.6	9740	380	0.586	0.058	423	38	501	44
CT05-37	87.9	0.98		931000	45000	3.26	0.78	0.89	0.22	852	40	1.71	0.11	2.07	0.72	12.7	1.4	0.49	0.16	2.55	0.66	2.08	0.24	0.476	0.06	10.89	0.75	4	0.22	56.4	2.7	24.6	1.1	141.4	5.9	36.8	1.5	380	16	91	3.5	8810	340	0.593	0.041	235	12	524	22
CT05-17	88.1	0.99		815000	45000	3.5	0.91	16.4	1.8	1045	34	2.36	0.15	72.4	8.2	155	17	16.5	1.9	68.5	8	12.8	1.4	1.09	0.11	19.1	1.2	5.23	0.25	68.2	2.3	30.2	1	169	5.4	44.3	1.5	469	16	111	3.8	9800	400	0.876	0.051	263.4	9.3	655	23
CT05-51	88.2	0.99		903000	52000	9.3	1.6	9.3	2	1660	240	1.51	0.21	0.222	0.067	11.2	1.6	0.163	0.036	2.12	0.34	4.38	0.71	0.95	0.15	27.3	3.9	9.8	1.4	132	19	49.9	6.7	251	34	51.8	6.8	479	62	94	12	6640	460	0.431	0.057	357	71	313	46
CT05-52	88.8	1		823000	46000	9.5	1.5	0.356	0.058	1789	85	1.198	0.098	0.0082	0.0049	9.46	0.48	0.197	0.026	2.91	0.24	5.81	0.49	0.707	0.064	31.5	1.8	10.68	0.59	142.9	7.2	54.5	2.6	270	13	55.1	2.7	501	23	95.8	4.6	9840	350	0.487	0.035	224	13	317	15
CT05-80	90.4	1.05		795000	45000	4.2	0.99	11.7	1.6	474	29	0.642	0.056	25.9	3.8	52.9	7	5.03	0.73	18.8	2.7	4.02	0.47	0.903	0.084	8.93	0.58	2.67	0.19	36	2.4	15.2	1	85.9	5.2	20.9	1.2	236	12	54.5	2.8	9830	380	0.328	0.032	132.8	9.5	260	12
CT05-24	92.1	1.04		907000	38000	3.48	0.94	16.1	4.5	520	22	1.215	0.095	41	12	84	23	8.3	2.5	31	9.2	5.5	1.3	1.02	0.18	9	1	2.62	0.18	35.7	1.9	15.69	0.74	90.3	3.6	24	1	262	12	66	3.1	8720	360	0.546	0.045	224	13	456	20
CT05-35	92.9	1.03		835000	57000	6.6	1.5	1.45	0.25	1230	79	2.43	0.16	0.342	0.075	9.28	0.4	0.12	0.024	1.35	0.18	2.57	0.31	0.457	0.057	17.8	1.5	6.82	0.51	95.1	6.6	39.1	2.4	202	11	46.2	2.4	426	20	91.7	3.8	11020	570	1.329	0.081	215	17	739	34
CT05-19	93.5	1.05		879000	45000	3.32	0.94	1.66	0.24	1495	53	3.9	0.21	7.8	1.3	28.6	2.8	2.16	0.39	10.4	1.8	3.93	0.43	0.424	0.049	16.47	0.85	6.21	0.28	95.8	3.8	42	1.6	235.7	9.1	58	2.3	588	23	131.3	5.2	9600	410	1.511	0.093	382	21	803	36
CT05-12	94.8	1.08		763000	54000	5.2	1.2	72	13	572	19	0.991	0.094	162	30	308	55	32.2	5.9	119	22	20.1	3.6	3.09	0.51	19.5	2.2	4.05	0.29	44.9	2.2	17.89	0.71	97.5	3.6	24.01	0.92	264.6	9.8	62.1	2.3	9030	350	0.422	0.035	185	7	353	12
CT05-5	87.4	0.98
[truncated: 2 more columns]

## Sheet: Table S5B
Element	Reference Values	Measured Values Min.	Measured Values Max.	Mean Measured Values	91500-1	91500-2	91500-3	91500-4	91500-5	91500-6	91500-7	91500-8	91500-9	91500-10	91500-11	91500-12	91500-13	91500-14	91500-15	91500-16	91500-17	91500-18	91500-19	91500-20	91500-21	91500-22	91500-23	91500-24	91500-25	91500-26	91500-27	91500-28
Ce	2.6	2.25	3.45	2.80536	2.46	2.74	2.65	2.7	2.81	3.02	2.45	2.73	2.67	2.71	2.82	3.05	3.19	2.91	2.97	3.21	2.25	2.3	2.62	3.03	2.74	2.99	2.8	2.86	3.45	2.72	2.91	2.79
Dy	11.1	9.3	13.56	11.3425	10.02	11.38	10.48	11.32	11.58	11.91	9.99	11.4	10.52	11.37	11.62	11.98	13.05	12.15	13.3	13.56	9.34	9.53	9.38	11.48	11.35	12.46	11.49	9.3	11.8	11.44	12.53	11.86
Er	25	20.07	30.3	25.5293	23.11	25.6	24	25.5	26.9	27.2	22.89	25.56	24.1	25.5	27	27.3	30.3	26.35	28.82	30	21.04	21.63	20.07	26.3	25.61	28.3	25.37	21.14	24.88	26.05	28.75	25.55
Eu	0.24	0.152	0.288	0.223714	0.182	0.225	0.206	0.214	0.233	0.236	0.181	0.22	0.205	0.215	0.226	0.225	0.268	0.223	0.23	0.288	0.182	0.152	0.209	0.218	0.204	0.283	0.236	0.24	0.279	0.214	0.212	0.258
Gd	2.2	1.65	2.64	2.15071	1.91	2.28	2.08	2.04	2.32	2.16	1.9	2.28	2.07	2.05	2.35	2.15	2.64	2.1	2.32	2.61	1.86	1.65	1.82	2.02	2.27	2.35	2.22	1.83	2.31	2.13	2.24	2.26
Hf	5900	4750	6740	5992.5	5220	5930	6180	5990	5980	6320	5240	5920	6190	6010	6010	6340	6680	6740	6660	6590	4750	5200	5430	5940	5750	6130	5940	5950	6110	5900	6660	6030
Ho	4.8	3.78	5.57	4.645	4.19	4.63	4.42	4.71	4.84	4.81	4.18	4.61	4.44	4.7	4.85	4.83	5.57	4.9	5.23	5.41	4.01	3.86	3.78	4.76	4.56	5.13	4.68	3.81	4.49	4.79	5.16	4.71
La	0.006	0.00034	0.2	0.018595	0.0031	0.001	0.001	0.00067	0.00067	0.001	0.0032	0.001	0.001	0.00067	0.00061	0.001	0.001	0.0009	0.001	0.00034	0.001	0.001	0.045	0.2	0.001	0.001	0.0008	0.087	0.16	0.0037	0.001	0.001
Lu	13	10.38	15.44	13.0686	11.83	12.98	12.43	13.17	13.64	13.84	11.84	12.96	12.47	13.18	13.64	13.93	15.44	13.61	14.45	15.27	10.89	11.04	10.38	13.49	12.62	15.22	13.27	10.77	12.32	13.28	14.83	13.13
Nb	0.79	0.94	1.24	1.07361	1.128	1.209	1.134	1.097	1.068	1.085	1.132	1.205	1.126	1.089	1.073	1.096	1.054	1.049	1.145	1.062	0.94	0.96	1.019	1.012	0.947	1.15	0.94	1.039	1.24	0.982	1.1	0.98
Nd	0.24	0.127	0.61	0.226321	0.154	0.242	0.169	0.2	0.236	0.195	0.158	0.244	0.166	0.197	0.224	0.197	0.249	0.201	0.195	0.244	0.213	0.14	0.325	0.162	0.163	0.216	0.127	0.444	0.61	0.222	0.253	0.191
Pr	0.024	0.0045	0.125	0.0161464	0.0096	0.008	0.0078	0.0061	0.0081	0.0093	0.0093	0.0073	0.0066	0.0061	0.0078	0.0096	0.0084	0.0091	0.0114	0.0143	0.0105	0.0067	0.042	0.0152	0.0045	0.0085	0.0133	0.058	0.125	0.0088	0.0063	0.0145
Sm	0.44	0.306	0.62	0.412	0.33	0.357	0.396	0.404	0.327	0.52	0.348	0.354	0.4	0.399	0.313	0.525	0.47	0.481	0.458	0.494	0.32	0.306	0.341	0.313	0.362	0.417	0.4	0.431	0.62	0.48	0.51	0.46
Sr	0.052	0.08	0.67	0.147679	0.117	0.099	0.116	0.095	0.083	0.105	0.104	0.096	0.115	0.094	0.08	0.11	0.15	0.092	0.089	0.087	0.14	0.095	0.323	0.145	0.099	0.135	0.112	0.67	0.442	0.105	0.136	0.101
Ta	1	0.378	0.651	0.50325	0.483	0.537	0.524	0.534	0.565	0.542	0.482	0.536	0.526	0.535	0.563	0.543	0.651	0.528	0.614	0.618	0.378	0.392	0.391	0.458	0.474	0.499	0.462	0.425	0.46	0.415	0.494	0.462
Tb	0.86	0.596	0.964	0.800464	0.723	0.802	0.723	0.821	0.833	0.838	0.722	0.809	0.723	0.823	0.845	0.843	0.964	0.824	0.882	0.949	0.596	0.648	0.672	0.85	0.737	0.897	0.851	0.694	0.812	0.815	0.943	0.774
Th	30	21	38.7	29.5532	26.8	29.84	26.86	30.2	31.7	31.5	26.9	29.9	26.94	30.3	31.8	31.6	37.8	29.21	34.44	38.7	24.54	24.6	21	30.1	29.24	33	29.44	22.04	25.76	30.3	33.38	29.6
Ti	4.73	3.99	8.1	5.89857	6.3	6.4	5.6	5.54	5.6	4.6	6.2	6.3	5.5	5.65	5.5	4.8	6.9	5.9	6.2	5	5.6	6.2	3.99	5.1	6.1	8.1	7.8	6.3	5.1	7.6	7.2	4.08
Tm	6.9	5.19	7.86	6.51964	5.85	6.51	6.23	6.45	6.85	6.93	5.83	6.49	6.26	6.45	6.88	6.96	7.81	6.71	7.3	7.86	5.37	5.47	5.19	6.67	6.54	7.39	6.49	5.42	6.16	6.64	7.2	6.64
U	80	65.6	111	85.6036	79.8	85.7	79.9	87.5	92.6	90.7	79.7	85.2	80.1	87.8	92.8	91.2	109.2	85.2	98.9	111	69.2	70	65.6	86.5	81.8	91.5	81.3	70.5	78.1	85.6	93.7	85.8
Y	140	113.1	169.4	140.089	125.8	140.3	132.3	141.3	146.5	147.3	125.4	140.2	132.7	141.5	146.9	148.1	168.1	143.6	158.9	169.4	113.1	115.5	115.4	138.4	137.8	154.1	138.1	118.9	144.2	141.7	155.3	141.7
Yb	74	51.8	78.8	65.9964	60.1	65.8	63.2	66.4	68.2	69.1	60.2	65.7	63.4	66.1	68.5	69.5	78.8	67.2	75.5	78.7	53.9	55.9	51.8	68.1	65.8	73.2	66.3	56	61.6	65.6	74.4	68.9

## Sheet: Table S5C
Table 5C: Operating conditions for the LA-ICP-MS equipment
Laboratory & Sample Preparation
Laboratory name	GeOHeLiS Analytical Platform, OSUR, Univ Rennes 1, France
Sample type/mineral	zircon
Sample preparation	Conventional mineral separation, 1-inch resin mount, 1mm polish to finish
Imaging	CL: RELION CL instrument, Olympus Microscope BX51WI, Leica Color Camera DFC 420C
Laser ablation system
Make, Model & type	ESI NWR193UC, Excimer
Ablation cell	ESI NWR TwoVol2
Laser wavelength	193 nm
Pulse width	< 5 ns
Fluence	6.8 J/cm2
Repetition rate	4 Hz
Spot size	30 μm
Sampling mode / pattern	Single spot
Carrier gas	100% He, Ar make-up gas and N2 (3 ml/mn) combined using in-house smoothing device
Background collection	20 seconds
Ablation duration	45 seconds
Wash-out delay	15 seconds
Cell carrier gas flow (He)	0.76 l/min
ICP-MS Instrument
Make, Model & type	Agilent 7700x, Q-ICP-MS
Sample introduction	Via conventional tubing
RF power	1350W
Sampler, skimmer cones	Ni
Extraction lenses	X type
Make-up gas flow (Ar)	0.80 l/min
Detection system	Single collector secondary electron multiplier
Data acquisition protocol	Time-resolved analysis
Scanning mode	Peak hopping, one point per peak
Detector mode	Pulse counting, dead time correction applied, and analog mode when signal intensity > ~ 106 cps
Masses measured	29Si, 49Ti, 88Sr, 89Y, 93Nb, 139La, 140Ce, 141Pr, 146Nd
	147Sm, 153Eu, 157Gd, 159Tb, 163Dy, 165Ho, 166Er, 169Tm, 172Yb, 175Lu, 178Hf, 181Ta, 232Th, 238U
Integration time per peak	10 ms
Total integration time per reading	275 ms
Sensitivity / Efficiency	22000 cps/ppm Pb (50µm, 10Hz)
Data Processing
Gas blank	20 seconds on-peak
Calibration strategy	NIST 612 as primary reference material, 91500 zircon as secondary reference material (quality control)
Reference Material info	NIST 612
	91500 (Wiedenbeck et al., 2004)
Data processing package used	Iolite (Paton et al., 2010)
Quality control / Validation	See supplementary Table 5B
Références
Paton C. et al. (2010) Improved laser ablation U–Pb zircon geochronology through robust downhole fractionation correction. Geochem. Geophys. Geosyst. 11, Q0AA06.
Wiedenbeck, M. et al., 2004. Further characterisation of the 91500 Zircon crystal. Geostandards and Geoanalytical Research, 28(1): 9-39.
